# Supplementary material for: Quality control for a traditional Chinese medicine, Millettia speciosa Champ, using ultra-high-performance liquid chromatography fingerprint, serum pharmacochemistry and network pharmacology
Source: Royal Society of Chemistry journal article supplement (doi:10.1039/d3ay01051a), 2023-01-01
Supplement: d3ay01051a1.pdf [file d3ay01051a1.pdf]

1        **Quality control for traditional Chinese medicine, *Millettia Speciosa***  
2                **Champ, using ultra-high-performance liquid chromatography**  
3        **fingerprint, serum pharmacochemistry and network pharmacology**

4        **Material and method**

5        **1. Study on serum pharmacochemistry of MSC**

6        *1.1 Optimization of dosage*

7        10 males SD rats were randomly divided into 5 groups (n=2): control group and 4  
8        MSC administration groups with different doses. Except control group, all group rats  
9        were administrated 6.25 g/kg, 15.625 g/kg, 25.0 g/kg, 31.25 g/kg of MSC, respectively,  
10        which were equivalent twice, 5 times, 8 times, 10 times to the clinical dosage in adults.  
11        The control group was given distilled water as above method. All rats were fasting 12  
12        h but freely drinking before experiment. After administrated 1.5 h, rats were  
13        anesthetized by intraperitoneal injection of 20% carbamate solution 0.5ml/100g. Rats  
14        blood samples were collected from the abdominal aorta and stand on ice for 30 min.  
15        Then blood samples were centrifugated at 3000 rpm for 10 min. The supernatant  
16        solution of same group rats was mixed and as pharmaceutic serum.

17        *1.2 Optimization of blood collection time*

18        15 males SD rats were randomly divided into 5 groups (n=3): control group and 4  
19        MSC administrated groups. Except control group, all groups were accepted 25.0 g/kg  
20        MSC. After administrated 1 h, 3 h, 6 h, 12 h, rats were anesthetized by intraperitoneal  
21        injection of 20% carbamate solution 0.5ml/100g, respectively. Rats blood samples were  
22        collected from the abdominal aorta and stand on ice for 30 min. Then blood samples  
23        were centrifugated at 3000 rpm for 10 min. The supernatant solution of same time of  
24        blood collection was mixed and as pharmaceutic serum for subsequent analysis. The  
25        control group was given distilled water as above method and collected blood samples  
26        from the abdominal aorta as control serum.

27        *1.3 Optimization of sample pretreatment method*

28        2 dose of serum 500  $\mu$ l were taken at 3 h time point, then 2.0 ml methanol and  
29        acetonitrile were added to precipitate protein, respectively. After that they were  
30        vortexed for 30s and centrifugated at 13000 rpm in 4 °C for 10 min. Finally, the  
31        supernatant solution was dry by N<sub>2</sub> and stored at -20 °C for subsequent analysis using  
32        LC-MS.

33        **2. Quantitative analysis of lenticin**

34        *2.1 Optimization of chromatographic condition*

35        Firstly, the lenticin standard was scan by full wavelength and its UV absorption map  
36        was recorded. Secondly, S3 test solution was used for mobile phases expedition which  
37        including methanol-water, acetonitrile-water and acetonitrile-0.1% formic acid in water.  
38        Thirdly, the flow rate with 0.2 ml/min, 0.3 ml/min and 0.4 ml/min were investigated in  
39        sequence. Finally, the column temperature for 20 °C, 30 °C and 40 °C were also  
40        optimized.

41 *2.2 Method validation*

42 The specificity was confirmed by injecting 1 µl of S3 test solution and negative  
43 sample solution. For linearity evaluation, lenticin standard solutions were made up at  
44 concentrations of 10.008, 25.02, 50.04, 100.08, 150.12, 200.16 µg/ml and analysis. For  
45 precision and repeatability evaluation, S3 test solution were continuous injected 6 times  
46 to value the precision, and 6 individual S3 test solution was analyzed in parallel for  
47 repeatability determination. To confirm the stability, the S3 test solution was tested at  
48 0,2,4,6,8,12,24 h, respectively. Recoveries was carried out by adding the know lenticin  
49 standard solution into 6 portions of S3 with known content for analysis its peak area.  
50 Recoveries were calculated as follow aquation:  $\text{recovery (\%)} = 100 * (\text{observed content} - \text{original content}) / \text{spiked content}$ .  
51

52 **Result**

53 **1. Serum pharmacochemistry analysis of MSC**

54 *1.1 Results of dosage optimization.*

55 In our previously look for literature found that the clinical dosage of MSC is 15 to  
56 30 g, and 30 g is the most prescribed dosage, which due to the MSC is a hard root  
57 medicine material and the prescription use larger to better play the effect [1]. So, the  
58 doses as 30 g are determined to our study, which translates to a dose of 3.125 g/kg for  
59 rats. What's more, our purposed is to find the prototypal and metabolic components that  
60 enter the bloodstream, but what components enters into the blood may be trace. To  
61 achieve the detection line of the instrument and better detect the prototype and  
62 metabolic components entering the blood, our experiment was converted 2, 5, 8 and 10  
63 times of human clinical dose (3.125g/kg for rats) into rat oral dose to investigate the  
64 best administration dose. The serum samples of different dose groups were determinate  
65 and the identified result between medicated serum and blank serum were compared  
66 based on the Compound Discoverer 3.1 software. Then the number of ingredients which  
67 consisted in medicated serum instead of blank serum were used as a quantitative  
68 indicator. The result was showed that there were more components which absorbed into  
69 blood were identified in the dose of 25.0 g/kg of medicated serum samples (**Table S11**).  
70 Moreover, their peaks response was relatively higher which were appropriated for  
71 analyzing and identifying (**Fig S4**).

72 *1.2 Result of blood collection time optimization*

73 The serum samples of multiple blood collection time points were analyzed based on  
74 Compound Discoverer 3.1 software. The blank serum and medicated serum were  
75 compared and the number of ingredients which consisted in medicated serum instead  
76 of blank serum were used as a quantitative indicator. The result showed that there were  
77 more components which absorbed into blood were identified in the medicated serum  
78 after administrating for 3 h (**Table S12**). In addition, their peaks response was relatively  
79 higher which were appropriated for analyzing and identifying (**Fig S5**).

80 *1.3 Result of pretreatment methods optimization.*

81 The serum samples usually contained many endogenous substances which would  
82 disturb the detection of components which absorbed into blood, so it's necessary for  
83 pretreating the serum samples before detection. The result exhibited that the samples

84 which had treated by acetonitrile were found more components that absorbed into blood  
 85 (Table S13). Besides, it has the less impurity peaks, good peak shape and the low  
 86 baseline which were good for the identification of constituents absorbed into blood (Fig  
 87 S6).

## 88 2. Quantitative analysis of lenticin

### 89 2.1 Chromatographic condition investigation

90 As the Figure S9 showed, the maximum absorption wavelength of lenticin was 280  
 91 nm through full wavelength scanning; Then the result of different mobile phase was  
 92 showed at Table S14 and Figure S10, the order of the peak area of each mobile phase  
 93 was acetonitrile-0.1% formic acid water > acetonitrile-water > methanol-water, but the  
 94 separation degree of acetonitrile-0.1% formic acid water was lower than other 2 mobile  
 95 phase and take into consideration the peak of MSC from different batches was various,  
 96 so acetonitrile-water was determinate as the best mobile phase; The result of flow rate  
 97 and column temperatures was demonstrated in Table S15, Figure S11 and Table S16,  
 98 Figure S12, and the flow rate of 0.2 ml/min and the column temperature of 40 °C have  
 99 excellent peak and separation degree.

100

101

Table S1 Collection information of 12 batches of *Millettia Speciosa* Champ from Guangdong province

| NO. | Source    | NO. | Source  |
|-----|-----------|-----|---------|
| S1  | Yangjiang | S7  | Baise   |
| S2  | Yangjiang | S8  | Baise   |
| S3  | Yangjiang | S9  | Baise   |
| S4  | Jiangmen  | S10 | Qinzhou |
| S5  | Jiangmen  | S11 | Qinzhou |
| S6  | Jiangmen  | S12 | Qinzhou |

102

103

Table S2 The similarity of precision test

| Sample     | 1     | 2     | 3     | 4     | 5     | 6     | Comparison |
|------------|-------|-------|-------|-------|-------|-------|------------|
| 1          | 1.000 | 0.936 | 0.940 | 0.950 | 0.934 | 0.947 | 0.942      |
| 2          | 0.936 | 1.000 | 0.999 | 0.997 | 0.992 | 0.985 | 0.999      |
| 3          | 0.940 | 0.999 | 1.000 | 0.998 | 0.995 | 0.986 | 0.999      |
| 4          | 0.950 | 0.997 | 0.998 | 1.000 | 0.991 | 0.988 | 0.999      |
| 5          | 0.934 | 0.992 | 0.995 | 0.991 | 1.000 | 0.984 | 0.996      |
| 6          | 0.947 | 0.985 | 0.986 | 0.988 | 0.984 | 1.000 | 0.988      |
| Comparison | 0.942 | 0.999 | 0.999 | 0.999 | 0.996 | 0.988 | 1.000      |

104

105

Table S3 The similarity of repeatability test

| Sample | S1-1  | S1-2  | S1-3  | S1-4  | S1-5  | S1-6  | Comparison |
|--------|-------|-------|-------|-------|-------|-------|------------|
| S1-1   | 1.000 | 0.996 | 0.998 | 0.996 | 0.999 | 0.996 | 0.999      |
| S1-2   | 0.996 | 1.000 | 0.999 | 0.986 | 0.995 | 0.998 | 0.992      |
| S1-3   | 0.998 | 0.999 | 1.000 | 0.992 | 0.997 | 0.998 | 0.996      |
| S1-4   | 0.996 | 0.986 | 0.992 | 1.000 | 0.996 | 0.989 | 0.999      |
| S1-5   | 0.999 | 0.995 | 0.997 | 0.996 | 1.000 | 0.995 | 0.999      |

|            |       |       |       |       |       |       |       |
|------------|-------|-------|-------|-------|-------|-------|-------|
| S1-6       | 0.996 | 0.998 | 0.998 | 0.989 | 0.995 | 1.000 | 0.993 |
| Comparison | 0.999 | 0.992 | 0.996 | 0.999 | 0.999 | 0.993 | 1.000 |

106

107

**Table S4 The similarity of stability test**

| Sample     | 0 h   | 2 h   | 4 h   | 8 h   | 12 h  | 24 h  | Comparison |
|------------|-------|-------|-------|-------|-------|-------|------------|
| 0 h        | 1.000 | 0.997 | 0.976 | 0.974 | 0.975 | 0.978 | 0.977      |
| 2 h        | 0.997 | 1.000 | 0.973 | 0.976 | 0.977 | 0.973 | 0.977      |
| 4 h        | 0.976 | 0.973 | 1.000 | 0.996 | 0.997 | 0.999 | 0.999      |
| 8 h        | 0.974 | 0.976 | 0.996 | 1.000 | 1.000 | 0.993 | 0.999      |
| 12 h       | 0.975 | 0.977 | 0.997 | 1.000 | 1.000 | 0.993 | 0.999      |
| 24 h       | 0.978 | 0.973 | 0.999 | 0.993 | 0.993 | 1.000 | 0.997      |
| Comparison | 0.977 | 0.977 | 0.999 | 0.999 | 0.999 | 0.997 | 1.000      |

108

109

**Table S5 Relative retention times of 9 common peaks in positive ion mode**

| NO. | S1    | S2    | S3    | S4    | S5    | S6    | S7    | S8    | S9    | S10   | S11   | S12   | RSD% |
|-----|-------|-------|-------|-------|-------|-------|-------|-------|-------|-------|-------|-------|------|
| 1   | 0.183 | 0.191 | 0.189 | 0.193 | 0.190 | 0.189 | 0.190 | 0.191 | 0.191 | 0.191 | 0.191 | 0.194 | 1.41 |
| 2   | 0.426 | 0.440 | 0.436 | 0.439 | 0.438 | 0.437 | 0.438 | 0.440 | 0.441 | 0.441 | 0.441 | 0.441 | 1.00 |
| 3   | 0.543 | 0.550 | 0.547 | 0.554 | 0.550 | 0.554 | 0.555 | 0.553 | 0.554 | 0.557 | 0.552 | 0.554 | 0.70 |
| 4   | 0.586 | 0.586 | 0.585 | 0.589 | 0.588 | 0.586 | 0.588 | 0.588 | 0.587 | 0.590 | 0.590 | 0.587 | 0.28 |
| 5   | 0.846 | 0.868 | 0.859 | 0.863 | 0.864 | 0.858 | 0.861 | 0.865 | 0.867 | 0.867 | 0.867 | 0.867 | 0.75 |
| 6   | 1.000 | 1.000 | 1.000 | 1.000 | 1.000 | 1.000 | 1.000 | 1.000 | 1.000 | 1.000 | 1.000 | 1.000 | 0.00 |
| 7   | 1.203 | 1.233 | 1.220 | 1.227 | 1.226 | 1.226 | 1.226 | 1.233 | 1.236 | 1.236 | 1.233 | 1.231 | 0.75 |
| 8   | 2.474 | 2.538 | 2.512 | 2.534 | 2.528 | 2.519 | 2.526 | 2.539 | 2.545 | 2.554 | 2.545 | 2.545 | 0.85 |
| 9   | 2.696 | 2.769 | 2.737 | 2.759 | 2.752 | 2.744 | 2.752 | 2.766 | 2.774 | 2.774 | 2.774 | 2.774 | 0.82 |

110

111

**Table S6 Relative retention times of 18 common peaks in negative ion mode**

| NO. | S1    | S2    | S3    | S4    | S5    | S6    | S7    | S8    | S9    | S10   | S11   | S12   | RSD% |
|-----|-------|-------|-------|-------|-------|-------|-------|-------|-------|-------|-------|-------|------|
| 1   | 0.096 | 0.096 | 0.096 | 0.097 | 0.096 | 0.096 | 0.096 | 0.096 | 0.096 | 0.096 | 0.096 | 0.095 | 0.52 |
| 2   | 0.124 | 0.124 | 0.124 | 0.124 | 0.124 | 0.123 | 0.124 | 0.123 | 0.124 | 0.116 | 0.124 | 0.124 | 1.69 |
| 3   | 0.198 | 0.198 | 0.198 | 0.188 | 0.186 | 0.189 | 0.198 | 0.200 | 0.199 | 0.190 | 0.199 | 0.191 | 2.73 |
| 4   | 0.328 | 0.328 | 0.330 | 0.331 | 0.330 | 0.330 | 0.332 | 0.333 | 0.334 | 0.336 | 0.336 | 0.340 | 1.13 |
| 5   | 0.567 | 0.570 | 0.570 | 0.573 | 0.572 | 0.571 | 0.574 | 0.574 | 0.578 | 0.578 | 0.578 | 0.583 | 0.79 |
| 6   | 0.620 | 0.620 | 0.623 | 0.624 | 0.623 | 0.620 | 0.620 | 0.619 | 0.618 | 0.618 | 0.616 | 0.616 | 0.43 |
| 7   | 0.643 | 0.643 | 0.640 | 0.647 | 0.647 | 0.644 | 0.650 | 0.648 | 0.652 | 0.652 | 0.654 | 0.657 | 0.76 |
| 8   | 0.685 | 0.685 | 0.687 | 0.689 | 0.687 | 0.686 | 0.690 | 0.688 | 0.692 | 0.692 | 0.692 | 0.697 | 0.49 |
| 9   | 0.887 | 0.887 | 0.887 | 0.889 | 0.887 | 0.883 | 0.887 | 0.883 | 0.885 | 0.885 | 0.883 | 0.887 | 0.24 |
| 10  | 1.000 | 1.000 | 1.000 | 1.000 | 1.000 | 1.000 | 1.000 | 1.000 | 1.000 | 1.000 | 1.000 | 1.000 | 0.00 |
| 11  | 1.218 | 1.218 | 1.218 | 1.222 | 1.220 | 1.214 | 1.220 | 1.216 | 1.220 | 1.220 | 1.220 | 1.225 | 0.24 |
| 12  | 1.378 | 1.378 | 1.380 | 1.383 | 1.380 | 1.373 | 1.380 | 1.376 | 1.380 | 1.382 | 1.380 | 1.388 | 0.28 |

|    |       |       |       |       |       |       |       |       |       |       |       |       |      |
|----|-------|-------|-------|-------|-------|-------|-------|-------|-------|-------|-------|-------|------|
| 13 | 1.453 | 1.453 | 1.453 | 1.458 | 1.455 | 1.448 | 1.455 | 1.451 | 1.455 | 1.455 | 1.455 | 1.462 | 0.23 |
| 14 | 1.957 | 1.957 | 1.957 | 1.961 | 1.957 | 1.947 | 1.957 | 1.952 | 1.957 | 1.957 | 1.957 | 1.968 | 0.24 |
| 15 | 1.979 | 1.979 | 1.982 | 1.986 | 1.979 | 1.972 | 1.979 | 1.974 | 1.982 | 1.982 | 1.982 | 1.991 | 0.25 |
| 16 | 2.015 | 2.015 | 2.015 | 2.019 | 2.015 | 2.005 | 2.015 | 2.009 | 2.017 | 2.015 | 2.015 | 2.026 | 0.25 |
| 17 | 2.242 | 2.239 | 2.239 | 2.244 | 2.239 | 2.228 | 2.239 | 2.233 | 2.239 | 2.239 | 2.239 | 2.248 | 0.23 |
| 18 | 2.290 | 2.288 | 2.290 | 2.293 | 2.288 | 2.279 | 2.290 | 2.284 | 2.290 | 2.292 | 2.288 | 2.300 | 0.22 |

112

113

**Table S7 Relative peak areas of 9 characteristic peaks in positive ion mode**

| NO. | S1    | S2    | S3     | S4     | S5    | S6    | S7    | S8    | S9    | S10   | S11   | S12   | RSD%   |
|-----|-------|-------|--------|--------|-------|-------|-------|-------|-------|-------|-------|-------|--------|
| 1   | 0.475 | 0.476 | 2.887  | 0.662  | 0.480 | 0.657 | 0.423 | 0.371 | 0.170 | 0.207 | 0.251 | 0.307 | 119.47 |
| 2   | 1.110 | 0.665 | 3.296  | 0.876  | 1.010 | 0.996 | 0.448 | 0.431 | 0.217 | 0.494 | 0.502 | 0.589 | 91.11  |
| 3   | 3.035 | 1.508 | 6.855  | 1.324  | 2.247 | 1.280 | 0.772 | 0.823 | 0.728 | 0.728 | 1.321 | 1.007 | 96.14  |
| 4   | 1.030 | 0.847 | 1.436  | 0.529  | 0.636 | 0.355 | 0.304 | 0.508 | 0.449 | 0.179 | 0.329 | 0.678 | 58.51  |
| 5   | 0.555 | 0.325 | 1.288  | 0.664  | 0.572 | 0.286 | 0.572 | 0.347 | 0.270 | 0.369 | 0.258 | 0.461 | 57.25  |
| 6   | 1.000 | 1.000 | 1.000  | 1.000  | 1.000 | 1.000 | 1.000 | 1.000 | 1.000 | 1.000 | 1.000 | 1.000 | 0.00   |
| 7   | 9.055 | 4.530 | 19.173 | 10.152 | 9.521 | 8.268 | 9.467 | 3.667 | 3.635 | 3.406 | 4.369 | 8.145 | 57.30  |
| 8   | 0.993 | 0.564 | 2.440  | 0.597  | 0.729 | 1.195 | 0.627 | 0.437 | 0.260 | 0.291 | 0.420 | 0.532 | 78.60  |
| 9   | 0.492 | 0.569 | 1.116  | 0.885  | 0.959 | 0.236 | 0.509 | 0.250 | 0.196 | 0.544 | 0.626 | 0.790 | 49.30  |

114

115

**Table S8 Relative peak areas of 18 characteristic peaks in negative ion mode**

| NO. | S1    | S2    | S3    | S4    | S5    | S6    | S7    | S8    | S9    | S10   | S11   | S12   | RSD%   |
|-----|-------|-------|-------|-------|-------|-------|-------|-------|-------|-------|-------|-------|--------|
| 1   | 0.232 | 0.213 | 0.228 | 0.180 | 0.164 | 0.350 | 0.181 | 0.260 | 0.243 | 0.420 | 0.295 | 0.181 | 31.26  |
| 2   | 0.918 | 0.682 | 0.869 | 0.610 | 0.543 | 1.425 | 0.564 | 0.432 | 0.336 | 1.075 | 0.465 | 0.339 | 47.63  |
| 3   | 0.201 | 0.090 | 0.286 | 0.143 | 0.112 | 0.234 | 0.163 | 0.106 | 0.098 | 0.267 | 0.069 | 0.089 | 48.29  |
| 4   | 0.242 | 0.202 | 0.333 | 0.202 | 0.217 | 0.170 | 0.091 | 0.189 | 0.086 | 0.318 | 0.194 | 0.116 | 39.60  |
| 5   | 0.167 | 0.201 | 0.272 | 0.133 | 0.145 | 0.047 | 0.093 | 0.071 | 0.085 | 0.127 | 0.146 | 0.113 | 45.77  |
| 6   | 1.135 | 1.801 | 8.159 | 0.968 | 0.987 | 0.135 | 0.434 | 0.499 | 0.620 | 1.236 | 1.187 | 0.598 | 145.32 |
| 7   | 0.312 | 0.362 | 0.394 | 0.206 | 0.280 | 0.079 | 0.141 | 0.101 | 0.122 | 0.413 | 0.464 | 0.228 | 51.04  |
| 8   | 0.843 | 0.828 | 0.820 | 0.988 | 0.700 | 0.438 | 0.963 | 1.136 | 1.191 | 1.361 | 0.803 | 0.867 | 26.52  |
| 9   | 0.959 | 1.170 | 3.330 | 1.112 | 1.201 | 0.341 | 0.494 | 0.317 | 0.672 | 1.946 | 1.653 | 1.100 | 70.09  |
| 10  | 1.000 | 1.000 | 1.000 | 1.000 | 1.000 | 1.000 | 1.000 | 1.000 | 1.000 | 1.000 | 1.000 | 1.000 | 0.00   |
| 11  | 0.112 | 0.255 | 0.358 | 0.361 | 0.392 | 0.099 | 0.099 | 0.071 | 0.090 | 0.534 | 0.472 | 0.308 | 62.65  |
| 12  | 0.406 | 0.392 | 0.521 | 0.262 | 0.293 | 0.551 | 0.270 | 0.641 | 0.535 | 0.265 | 0.296 | 0.262 | 35.18  |
| 13  | 0.270 | 0.400 | 1.076 | 0.285 | 0.298 | 0.080 | 0.165 | 0.047 | 0.206 | 0.432 | 1.185 | 0.394 | 89.58  |
| 14  | 0.228 | 0.611 | 0.309 | 0.587 | 0.615 | 0.164 | 0.343 | 0.406 | 0.383 | 1.472 | 1.230 | 0.525 | 68.99  |
| 15  | 0.127 | 0.432 | 0.235 | 0.376 | 0.543 | 0.107 | 0.181 | 0.207 | 0.142 | 0.981 | 0.839 | 0.465 | 73.79  |
| 16  | 0.230 | 0.468 | 0.226 | 0.594 | 0.712 | 0.209 | 0.317 | 0.338 | 0.256 | 1.399 | 1.098 | 0.521 | 70.98  |
| 17  | 0.954 | 1.235 | 0.813 | 1.017 | 1.836 | 0.303 | 0.797 | 1.195 | 0.946 | 1.992 | 2.302 | 1.489 | 46.05  |

|    |       |       |       |       |       |       |       |       |       |       |       |       |        |
|----|-------|-------|-------|-------|-------|-------|-------|-------|-------|-------|-------|-------|--------|
| 18 | 0.323 | 0.593 | 0.741 | 0.658 | 1.010 | 0.810 | 0.642 | 0.685 | 0.436 | 4.314 | 1.548 | 0.680 | 103.88 |
|----|-------|-------|-------|-------|-------|-------|-------|-------|-------|-------|-------|-------|--------|

116

117

**Table S9 Similarity evaluation results of 12 batches of MSC in positive ion mode**

| Sample     | S1    | S2    | S3    | S4    | S5    | S6    | S7    | S8    | S9    | S10   | S11   | S12   | Comparison |
|------------|-------|-------|-------|-------|-------|-------|-------|-------|-------|-------|-------|-------|------------|
| S1         | 1.000 | 0.982 | 0.985 | 0.969 | 0.983 | 0.976 | 0.964 | 0.977 | 0.975 | 0.937 | 0.965 | 0.970 | 0.984      |
| S2         | 0.982 | 1.000 | 0.974 | 0.964 | 0.980 | 0.963 | 0.946 | 0.987 | 0.978 | 0.966 | 0.982 | 0.967 | 0.985      |
| S3         | 0.985 | 0.974 | 1.000 | 0.962 | 0.978 | 0.969 | 0.947 | 0.961 | 0.949 | 0.935 | 0.959 | 0.955 | 0.973      |
| S4         | 0.969 | 0.964 | 0.962 | 1.000 | 0.992 | 0.986 | 0.992 | 0.974 | 0.977 | 0.961 | 0.969 | 0.996 | 0.991      |
| S5         | 0.983 | 0.980 | 0.978 | 0.992 | 1.000 | 0.980 | 0.979 | 0.976 | 0.974 | 0.969 | 0.983 | 0.989 | 0.992      |
| S6         | 0.976 | 0.963 | 0.969 | 0.986 | 0.980 | 1.000 | 0.986 | 0.978 | 0.977 | 0.940 | 0.956 | 0.982 | 0.988      |
| S7         | 0.964 | 0.946 | 0.947 | 0.992 | 0.979 | 0.986 | 1.000 | 0.968 | 0.976 | 0.942 | 0.949 | 0.992 | 0.985      |
| S8         | 0.977 | 0.987 | 0.961 | 0.974 | 0.976 | 0.978 | 0.968 | 1.000 | 0.994 | 0.963 | 0.971 | 0.976 | 0.991      |
| S9         | 0.975 | 0.978 | 0.949 | 0.977 | 0.974 | 0.977 | 0.976 | 0.994 | 1.000 | 0.960 | 0.969 | 0.982 | 0.990      |
| S10        | 0.937 | 0.966 | 0.935 | 0.961 | 0.969 | 0.940 | 0.942 | 0.963 | 0.960 | 1.000 | 0.986 | 0.961 | 0.972      |
| S11        | 0.965 | 0.982 | 0.959 | 0.969 | 0.983 | 0.956 | 0.949 | 0.971 | 0.969 | 0.986 | 1.000 | 0.968 | 0.981      |
| S12        | 0.970 | 0.967 | 0.955 | 0.996 | 0.989 | 0.982 | 0.992 | 0.976 | 0.982 | 0.961 | 0.968 | 1.000 | 0.991      |
| Comparison | 0.984 | 0.985 | 0.973 | 0.991 | 0.992 | 0.988 | 0.985 | 0.991 | 0.990 | 0.972 | 0.981 | 0.991 | 1.000      |

118

119

**Table S10 Similarity evaluation results of 12 batches of MSC in negative ion mode**

| Sample     | S1    | S2    | S3    | S4    | S5    | S6    | S7    | S8    | S9    | S10   | S11   | S12   | Comparison |
|------------|-------|-------|-------|-------|-------|-------|-------|-------|-------|-------|-------|-------|------------|
| S1         | 1.000 | 0.879 | 0.713 | 0.842 | 0.815 | 0.743 | 0.840 | 0.814 | 0.876 | 0.617 | 0.752 | 0.817 | 0.914      |
| S2         | 0.879 | 1.000 | 0.758 | 0.919 | 0.846 | 0.602 | 0.806 | 0.727 | 0.802 | 0.697 | 0.810 | 0.851 | 0.938      |
| S3         | 0.713 | 0.758 | 1.000 | 0.619 | 0.567 | 0.323 | 0.473 | 0.418 | 0.538 | 0.435 | 0.533 | 0.504 | 0.718      |
| S4         | 0.842 | 0.919 | 0.619 | 1.000 | 0.908 | 0.708 | 0.909 | 0.777 | 0.855 | 0.764 | 0.845 | 0.894 | 0.951      |
| S5         | 0.815 | 0.846 | 0.567 | 0.908 | 1.000 | 0.652 | 0.844 | 0.780 | 0.822 | 0.833 | 0.922 | 0.915 | 0.943      |
| S6         | 0.743 | 0.602 | 0.323 | 0.708 | 0.652 | 1.000 | 0.821 | 0.705 | 0.700 | 0.603 | 0.557 | 0.611 | 0.709      |
| S7         | 0.840 | 0.806 | 0.473 | 0.909 | 0.844 | 0.821 | 1.000 | 0.838 | 0.878 | 0.702 | 0.763 | 0.826 | 0.888      |
| S8         | 0.814 | 0.727 | 0.418 | 0.777 | 0.780 | 0.705 | 0.838 | 1.000 | 0.933 | 0.665 | 0.747 | 0.830 | 0.840      |
| S9         | 0.876 | 0.802 | 0.538 | 0.855 | 0.822 | 0.700 | 0.878 | 0.933 | 1.000 | 0.664 | 0.771 | 0.851 | 0.895      |
| S10        | 0.617 | 0.697 | 0.435 | 0.764 | 0.833 | 0.603 | 0.702 | 0.665 | 0.664 | 1.000 | 0.831 | 0.776 | 0.825      |
| S11        | 0.752 | 0.810 | 0.533 | 0.845 | 0.922 | 0.557 | 0.763 | 0.747 | 0.771 | 0.831 | 1.000 | 0.920 | 0.908      |
| S12        | 0.817 | 0.851 | 0.504 | 0.894 | 0.915 | 0.611 | 0.826 | 0.830 | 0.851 | 0.776 | 0.920 | 1.000 | 0.925      |
| Comparison | 0.914 | 0.938 | 0.718 | 0.951 | 0.943 | 0.709 | 0.888 | 0.840 | 0.895 | 0.825 | 0.908 | 0.925 | 1.000      |

120

121

**Table S11 The amounts of transitional components in the blood of different dose groups**

| Group       | Number of components absorbed into the blood |
|-------------|----------------------------------------------|
| 6.25 g/kg   | 215                                          |
| 15.625 g/kg | 128                                          |

|            |     |
|------------|-----|
| 25.0 g/kg  | 220 |
| 31.25 g/kg | 210 |

122  
123

**Table S12 The amounts of transitional components in blood at different blood sampling times**

| Group | Number of components absorbed into the blood |
|-------|----------------------------------------------|
| 1 h   | 49                                           |
| 3 h   | 65                                           |
| 6 h   | 43                                           |
| 12 h  | 30                                           |

124  
125

**Table S13 The amounts of transitional components in blood at different blood sampling times**

| Group        | Number of components absorbed into the blood |
|--------------|----------------------------------------------|
| Methanol     | 65                                           |
| Acetonitrile | 85                                           |

126  
127

**Table S14 Optimization of different mobile phases**

| Mobile phase type              | Retention time (min) | Peak area | Separation degree | Theoretical plates |
|--------------------------------|----------------------|-----------|-------------------|--------------------|
| Methanol-water                 | 7.667                | 163162    | 12.280321         | 13186.893480       |
| Acetonitrile-water             | 3.031                | 166783    | 10.453897         | 12378.883302       |
| Acetonitrile-0.1% formic water | 4.105                | 171453    | 5.4169755         | 12470.326432       |

128  
129

**Table S15 Optimization of different flow rates**

| Flow rate (ml/min) | Retention time (min) | Peak area | Separation degree | Theoretical plates |
|--------------------|----------------------|-----------|-------------------|--------------------|
| 0.2                | 5.641                | 252563    | 10.993685         | 15421.615969       |
| 0.3                | 3.031                | 166783    | 10.453897         | 12378.883302       |
| 0.4                | 3.031                | 127874    | 4.376920          | 11066.852614       |

130  
131

**Table S16 Investigation of different column temperatures**

| Column temperature | Retention time (min) | Peak area | Separation degree | Theoretical plates |
|--------------------|----------------------|-----------|-------------------|--------------------|
| 20°C               | 6.532                | 244150    | 13.147771         | 16046.684122       |

|      |       |        |           |              |
|------|-------|--------|-----------|--------------|
| 30°C | 5.641 | 252563 | 10.993685 | 15421.615969 |
| 40°C | 5.097 | 254039 | 10.916847 | 14911.895132 |

132  
133  
134

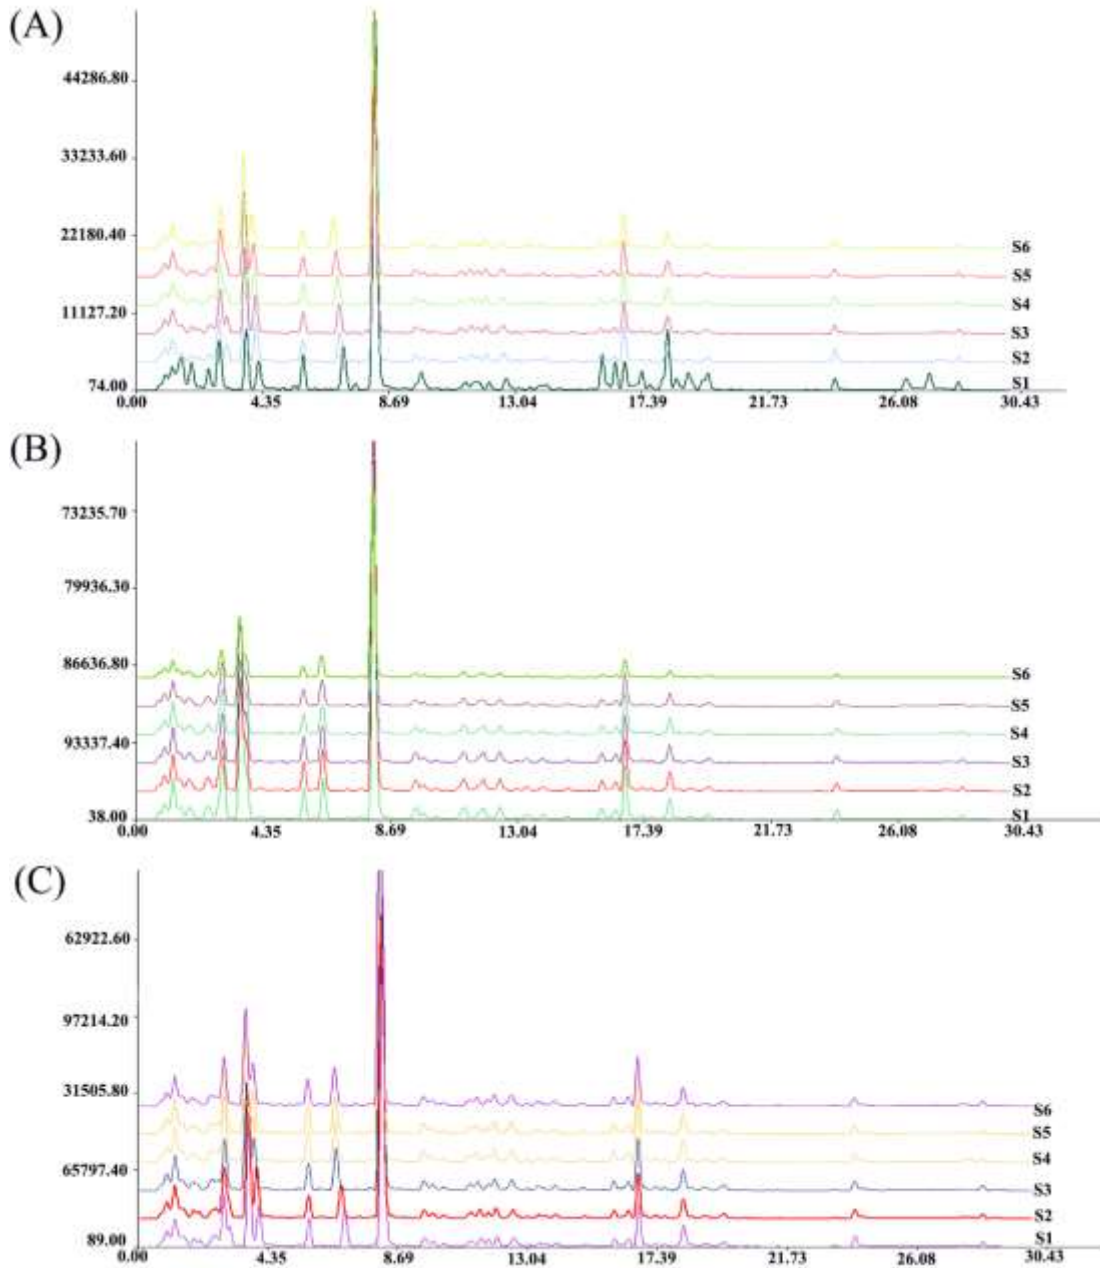

135  
136

Fig S1 Chromatogram of (A) precision; (B)repeatability;(C) stability test



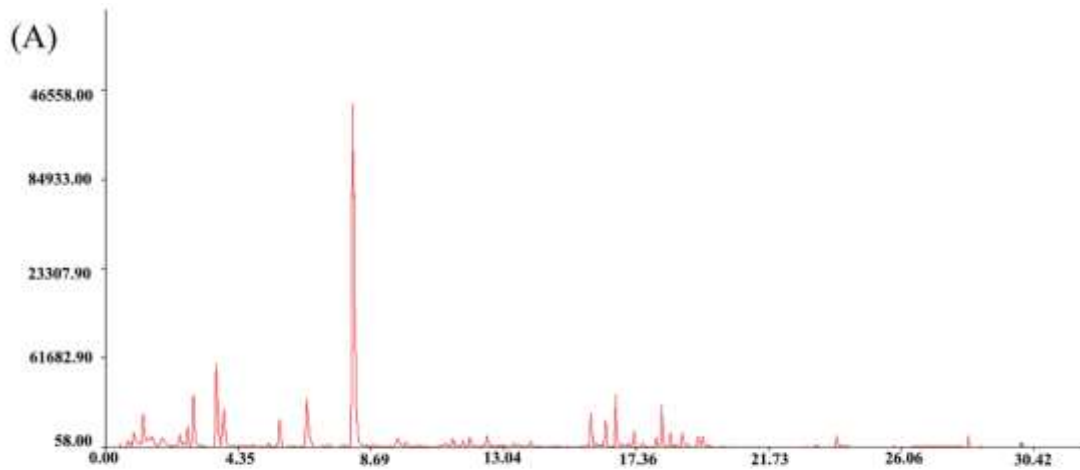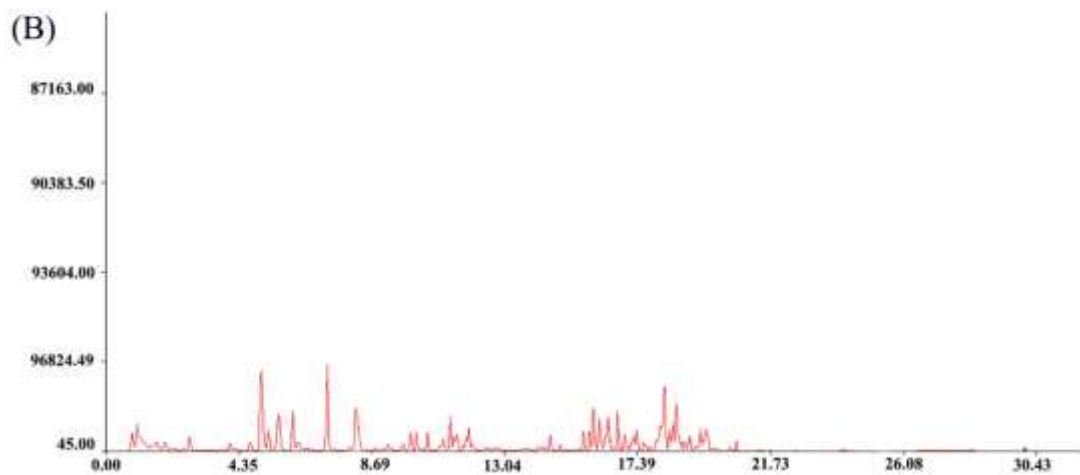

137

138

139

140

Fig S2 Referential fingerprint in (A) positive ion mode; (B) negative ion mode

1. Adenin

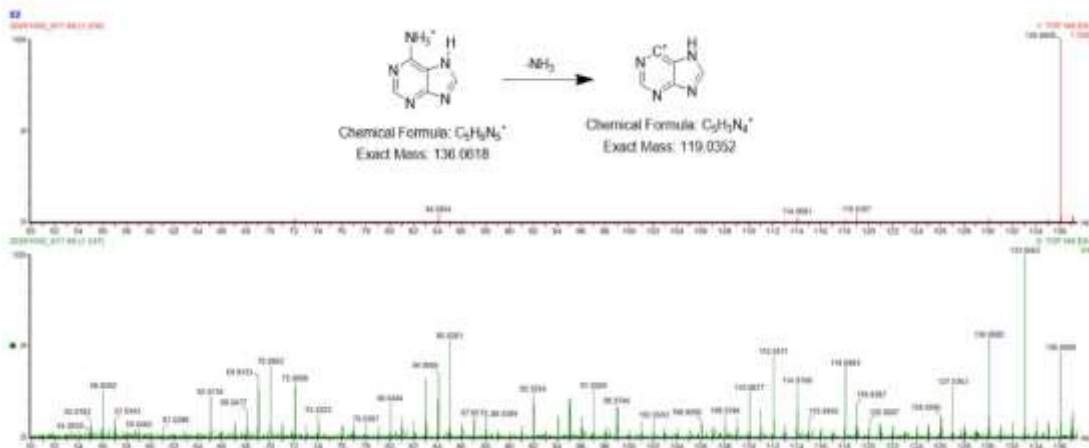

141

2. Guanine

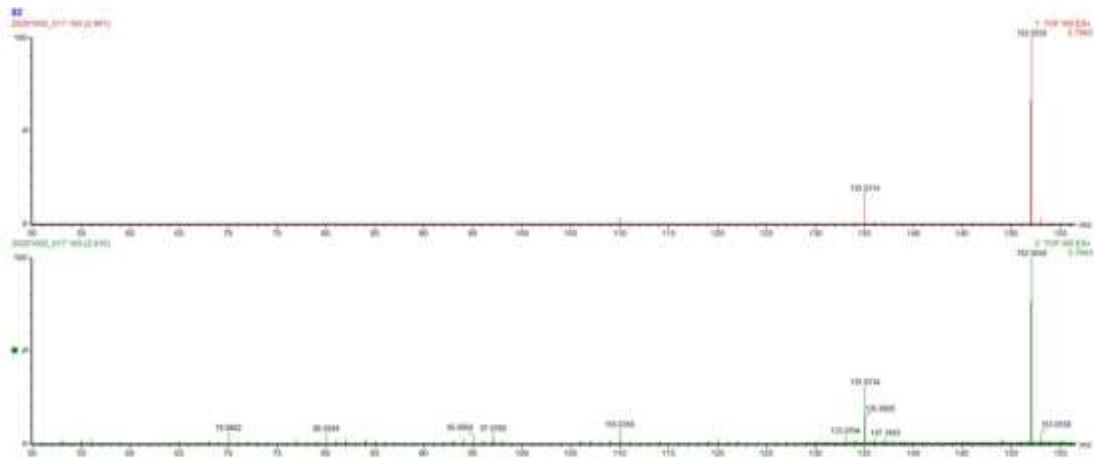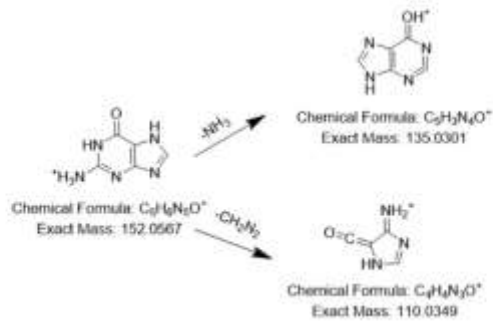

142  
143 3. Tryptophan

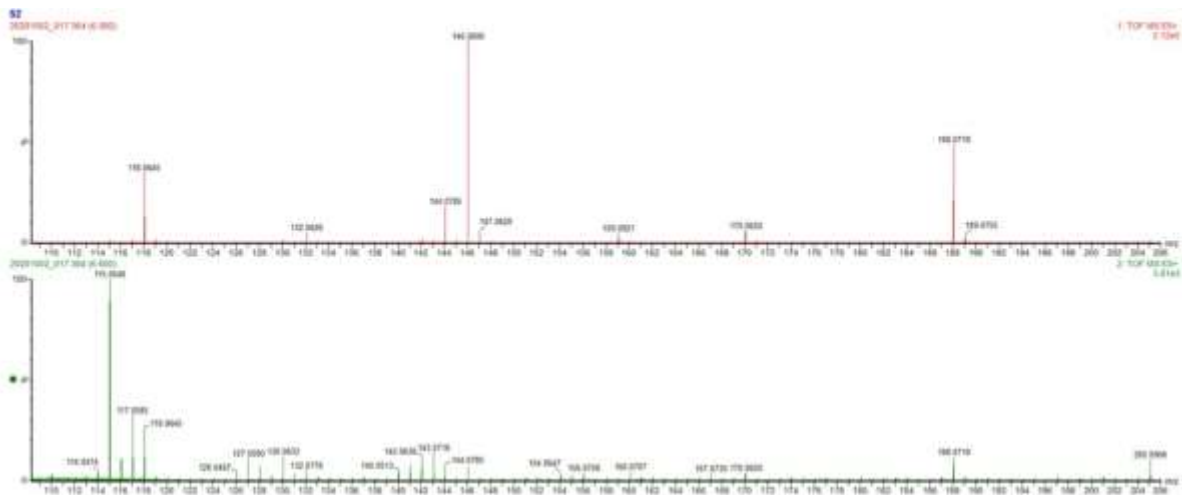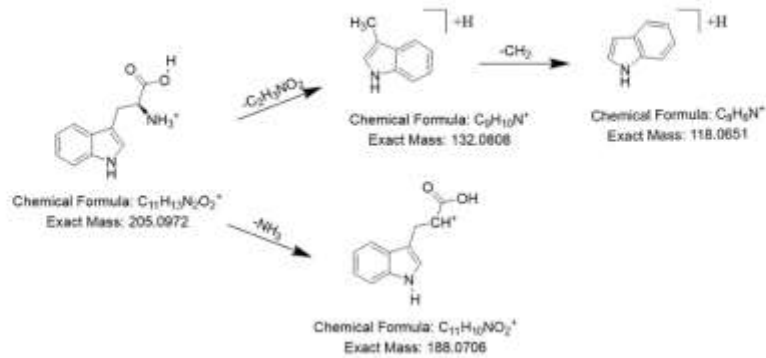

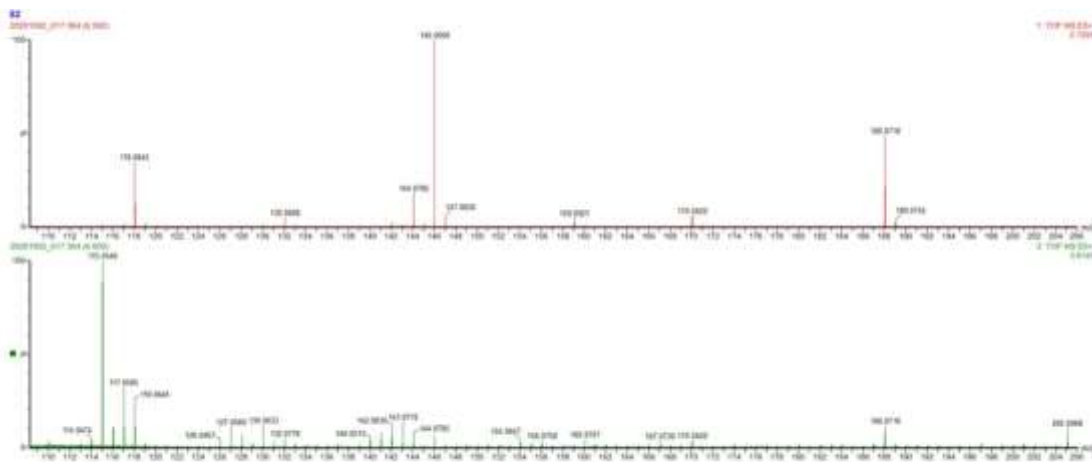

144

145 4. Lenticin

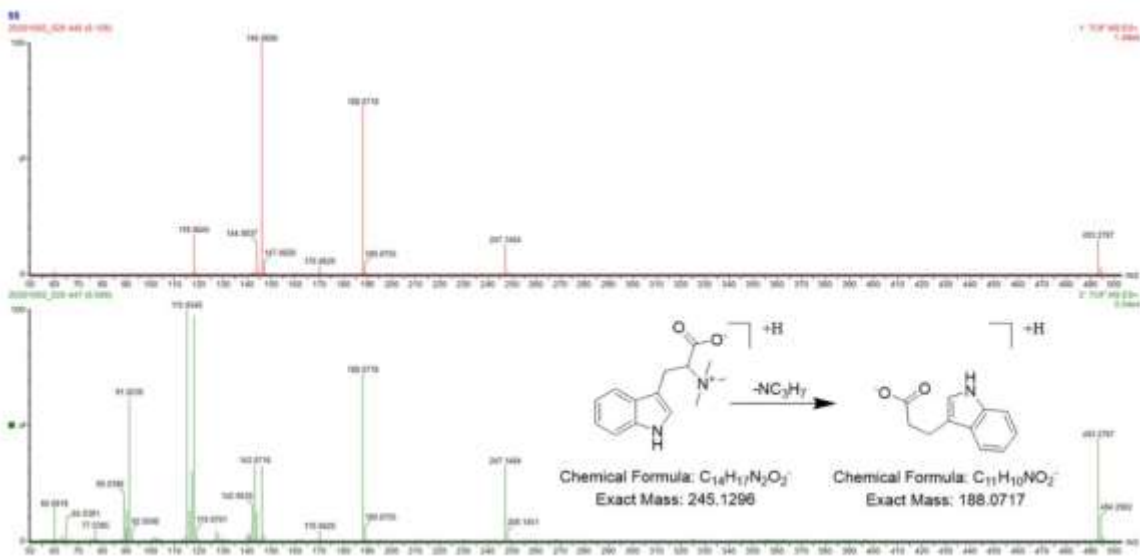

146

5. Glycyrrhetic acid

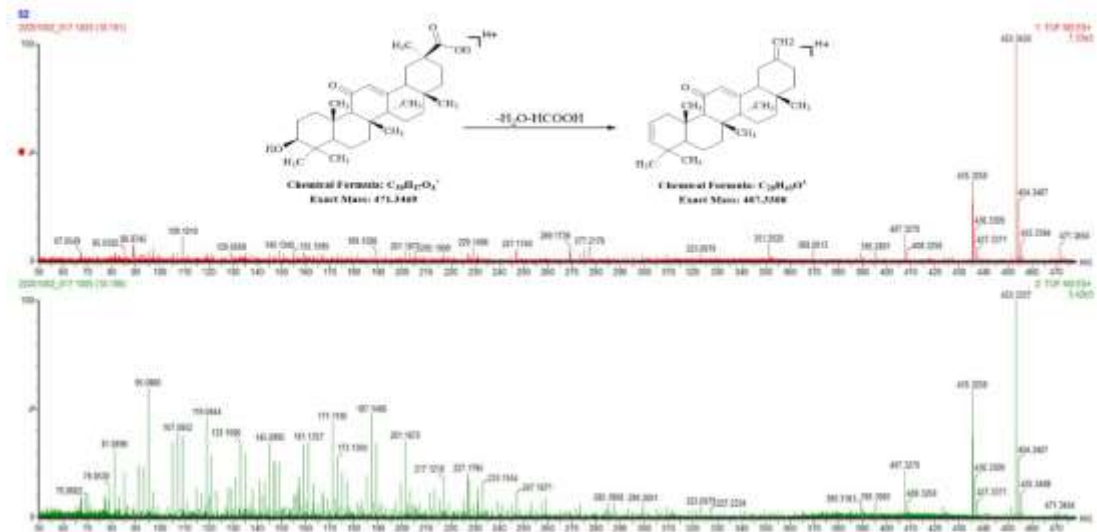

147

148 6. Uridine 5'-monophosphate

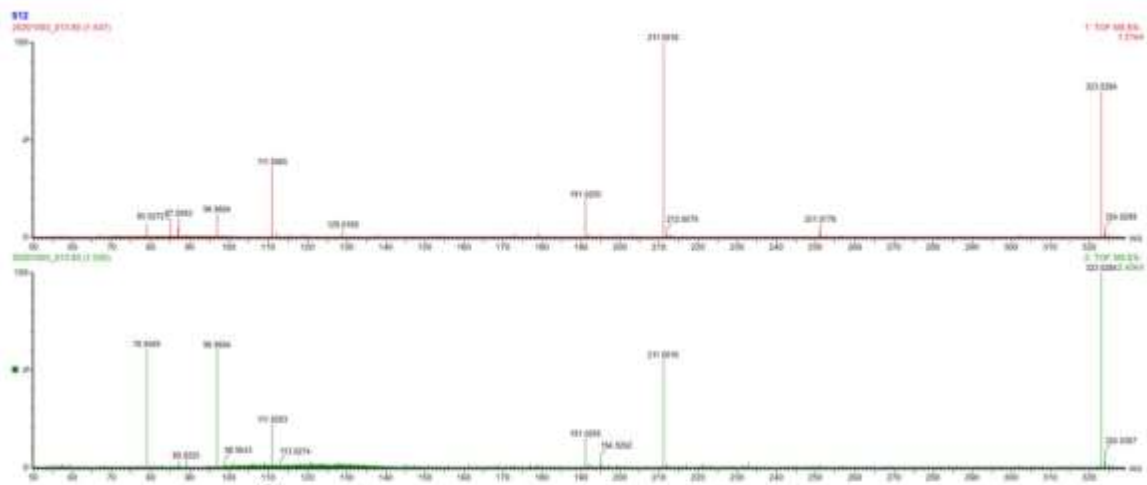

149

150 7. Malic acid

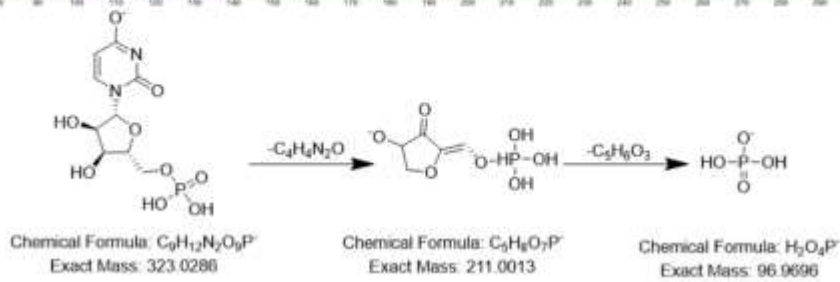

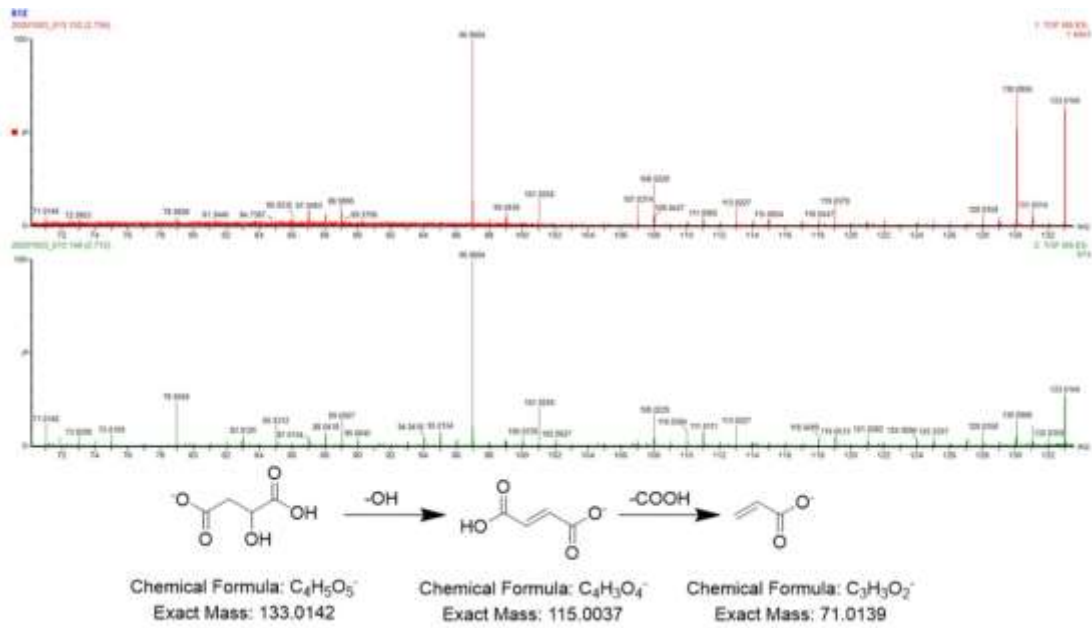

151  
152

8. Gentisic acid

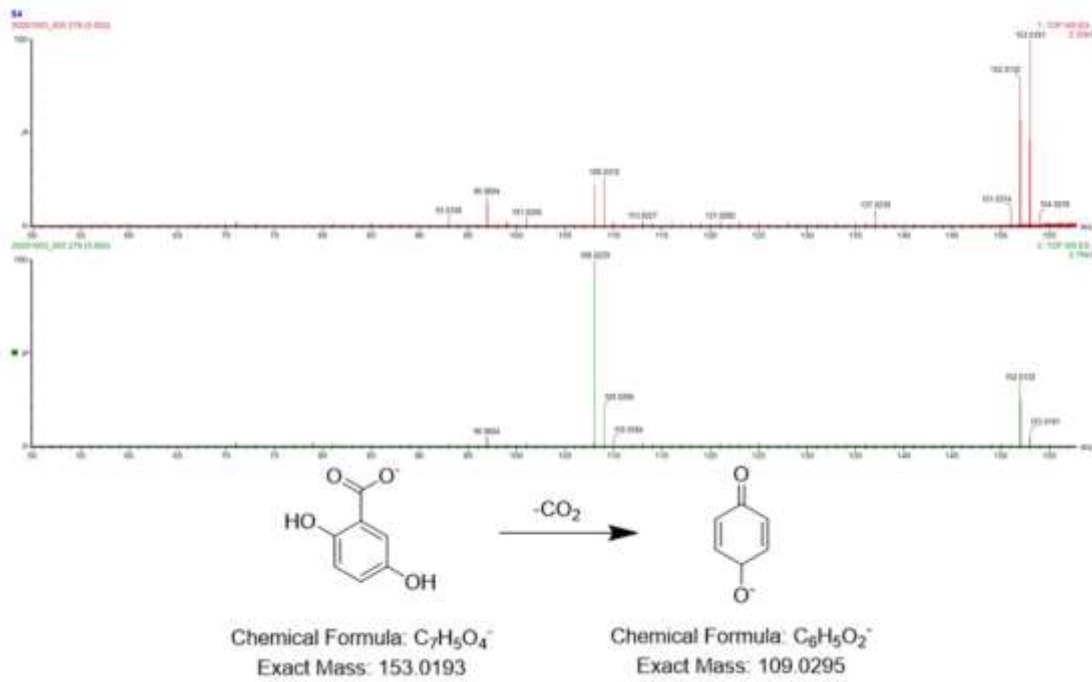

153  
154

9. 4-Hydroxybenzaldehyde

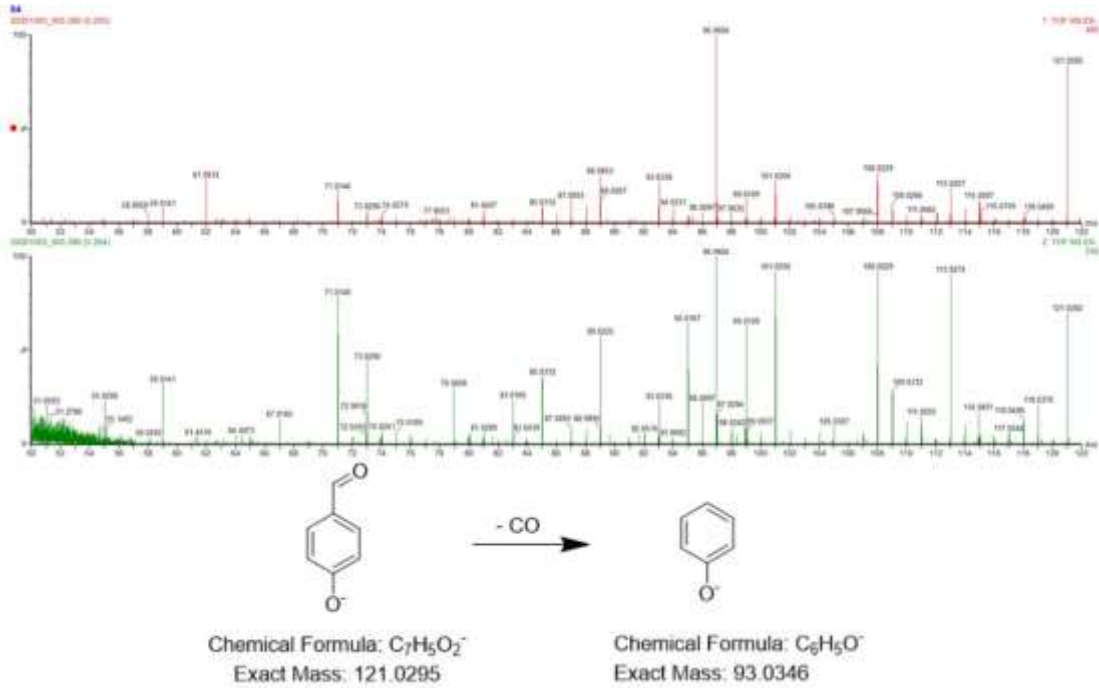

155

156 10. 4-Hydroxybenzoic

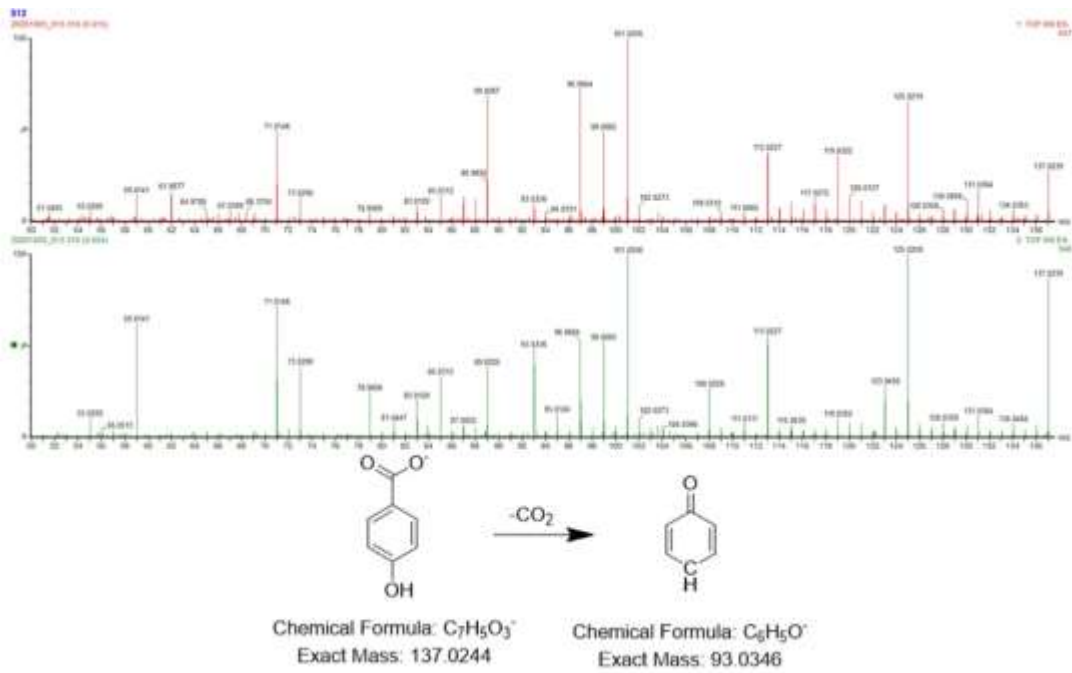

157

158 11. Lenticin

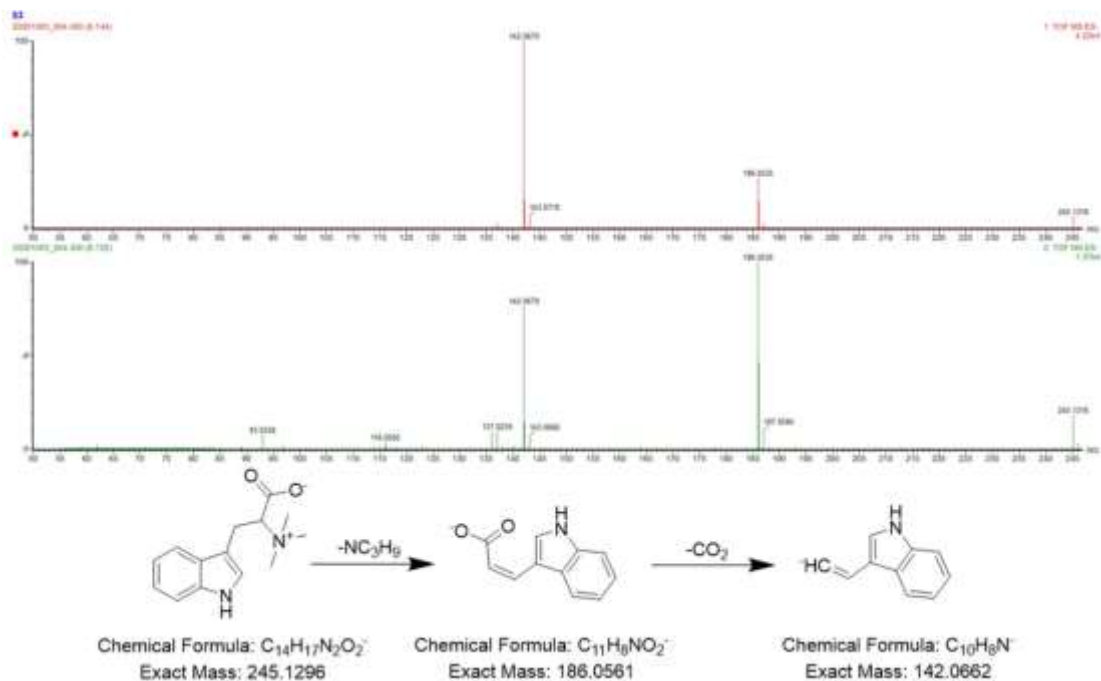

159

160 12. L-aspartic acid

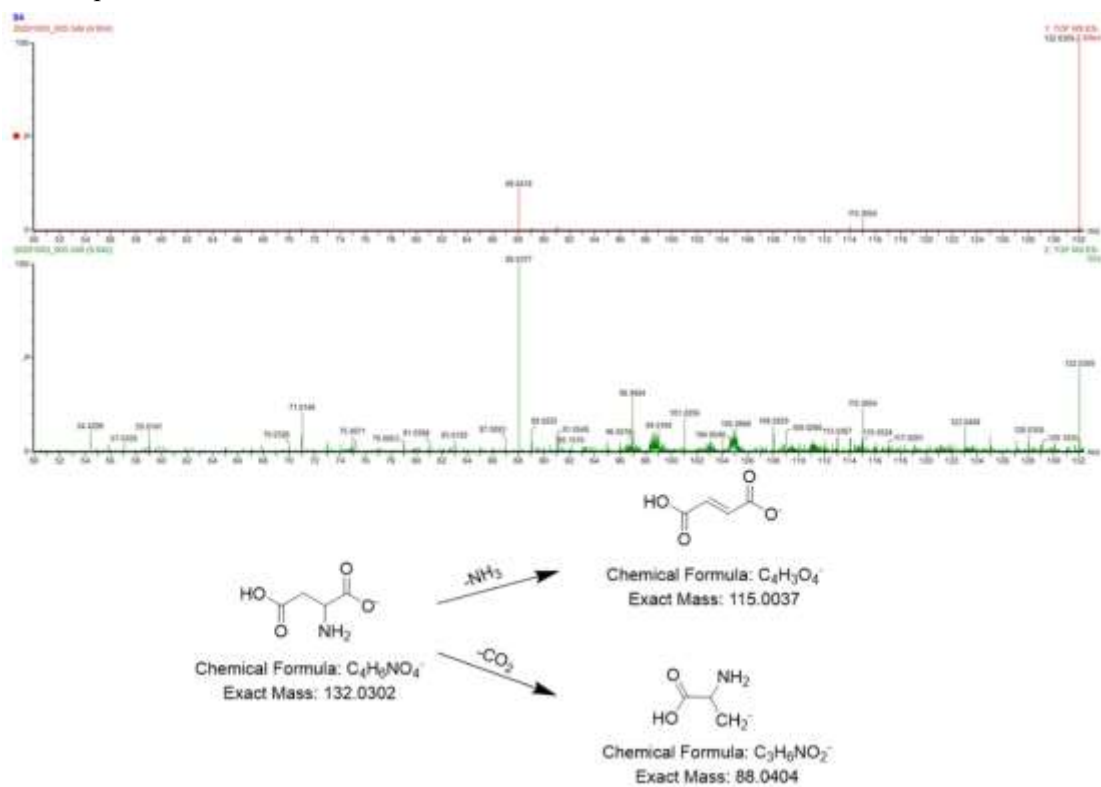

161

162

Fig S3 Mass spectrometry information and fragmentation patterns of common components of MSC

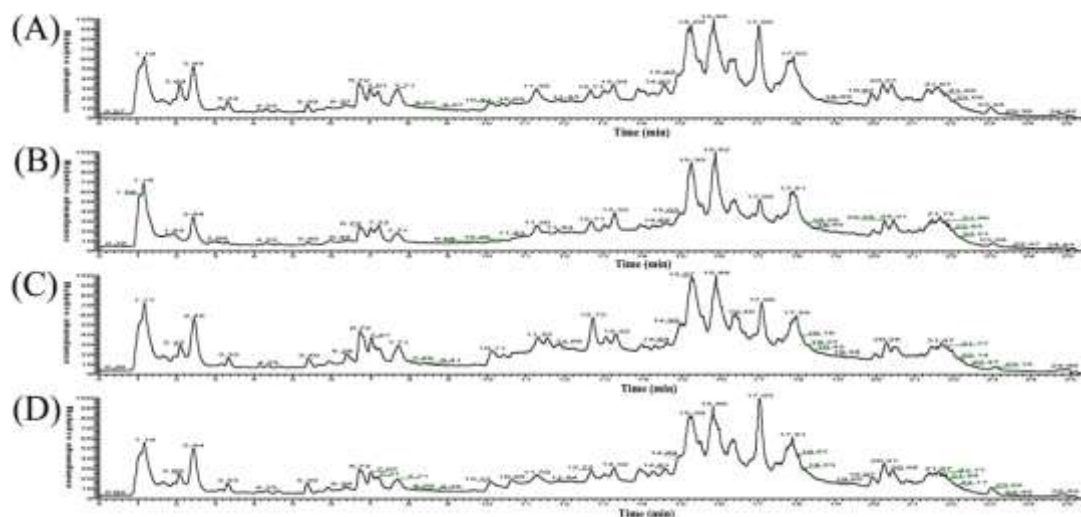

163  
164  
165  
166

Fig S4 Total ion chromatogram of different dose groups. (A) : 6.25 g/kg; (B) : 15.625 g/kg; (C) : 25.0 g/kg; (D) : 31.25 g/kg

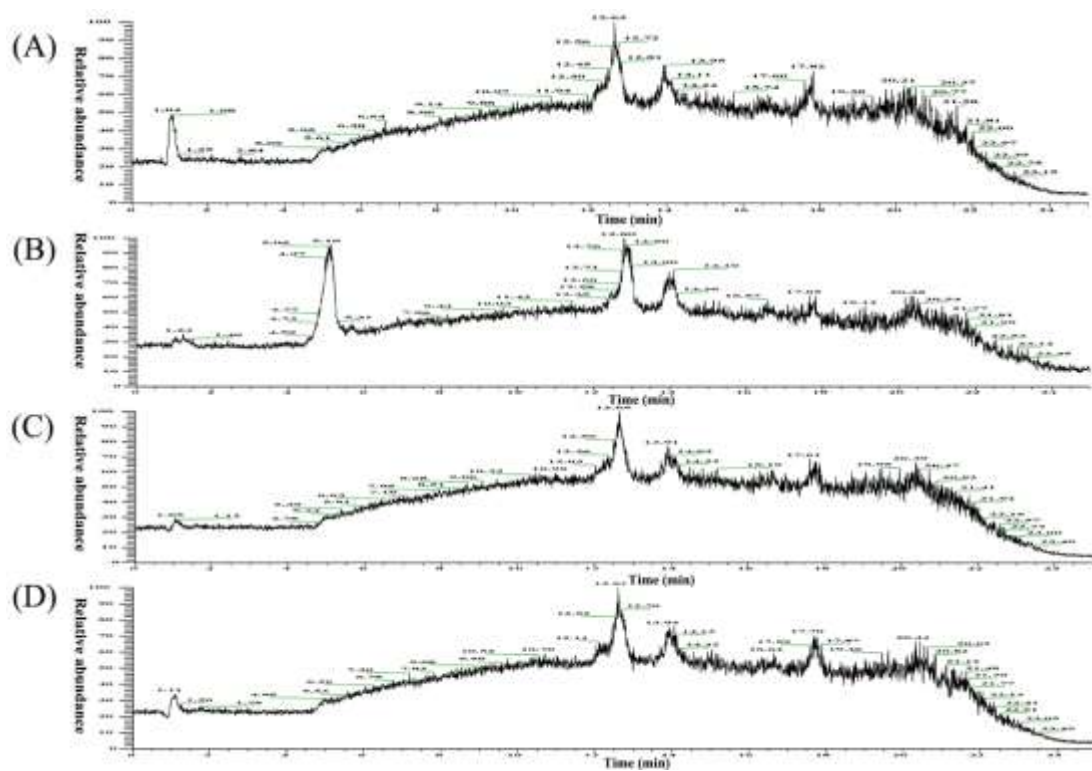

167  
168

Fig S5 Total ion chromatogram at different blood sampling times. (A) 1h; (B) : 3h; (C) : 6h; (D) : 12h



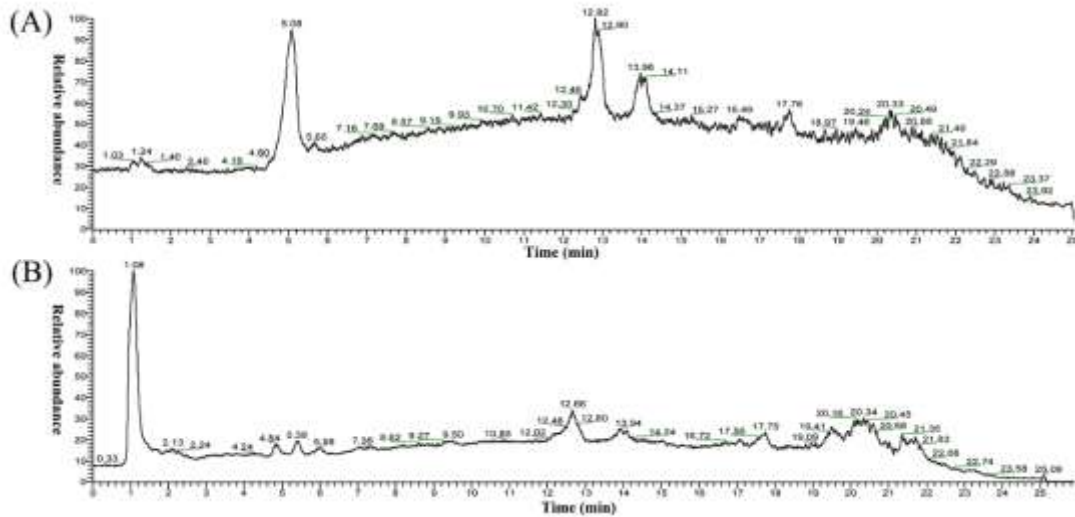

169  
170  
171  
172

Fig S6 Total ion chromatogram of different precipitated solvents. (A) Methanol; (B) Acetonitrile

1. Adenine

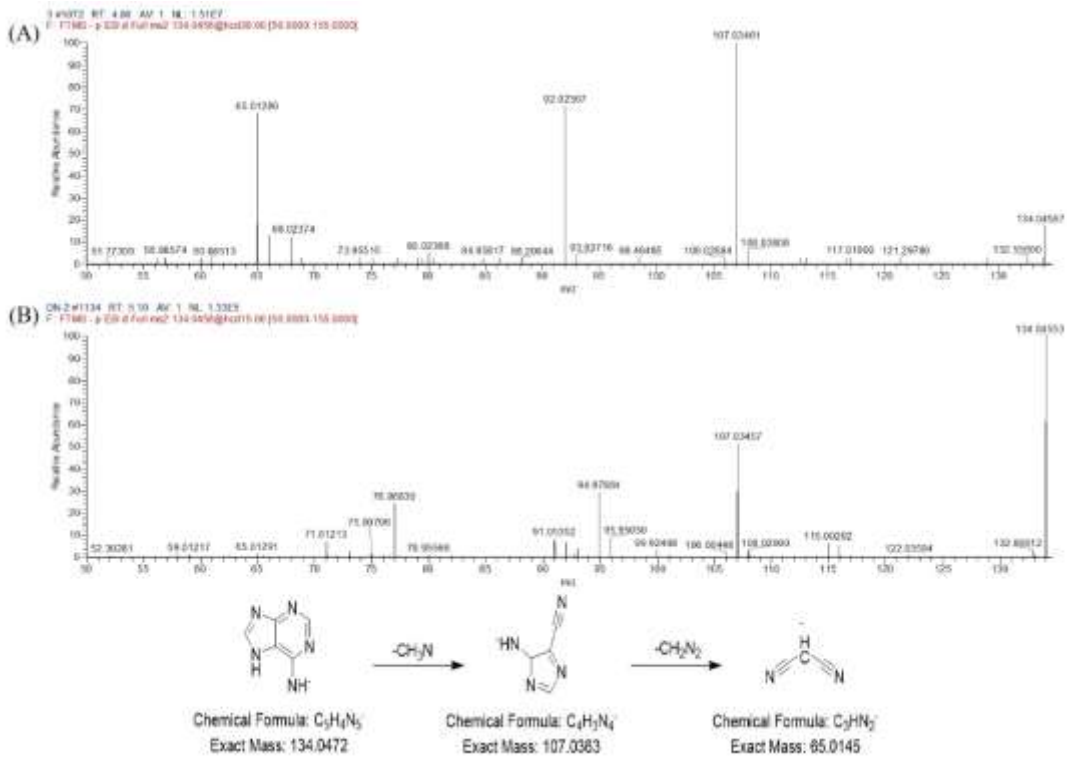

173  
174

2. Gentic acid

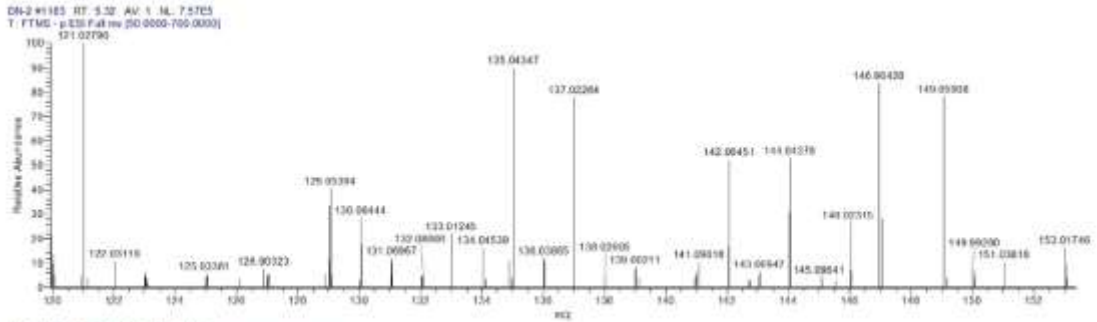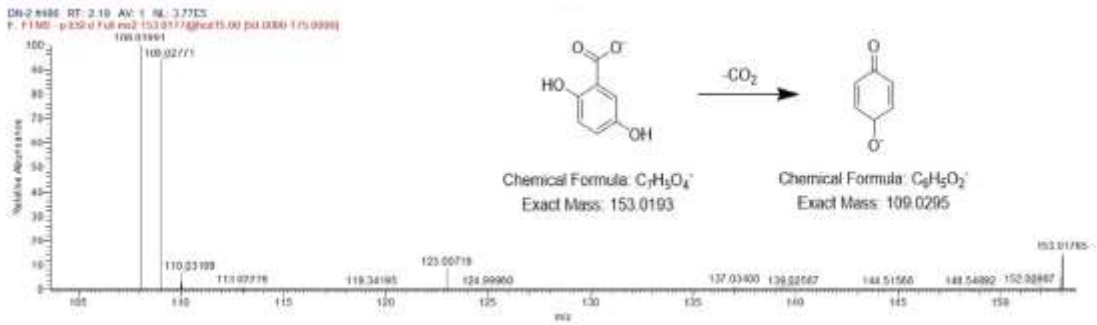

175

176

3. Tryptophan

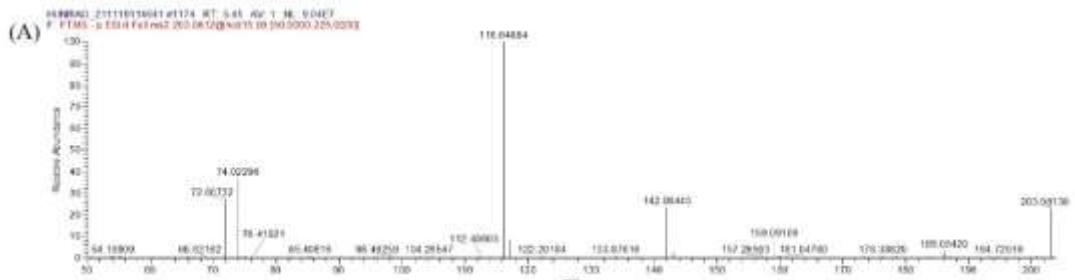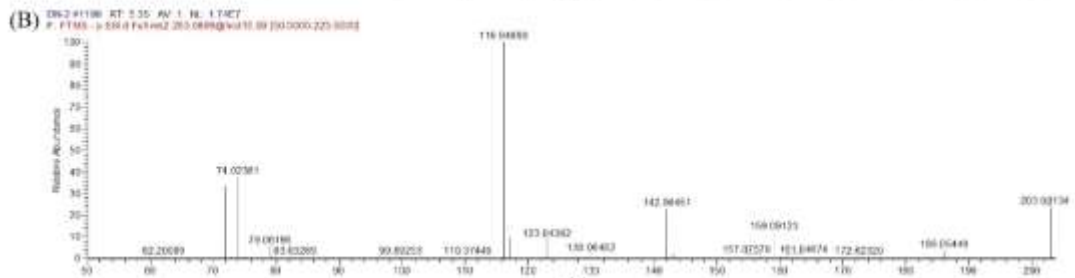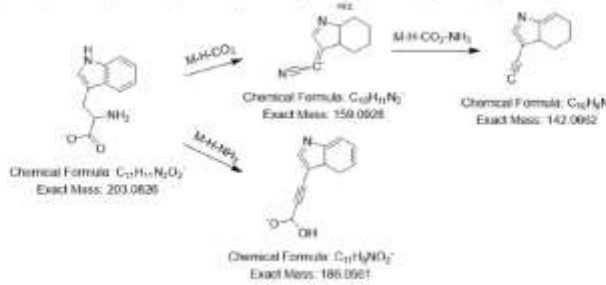

177

178

4. Lenticin

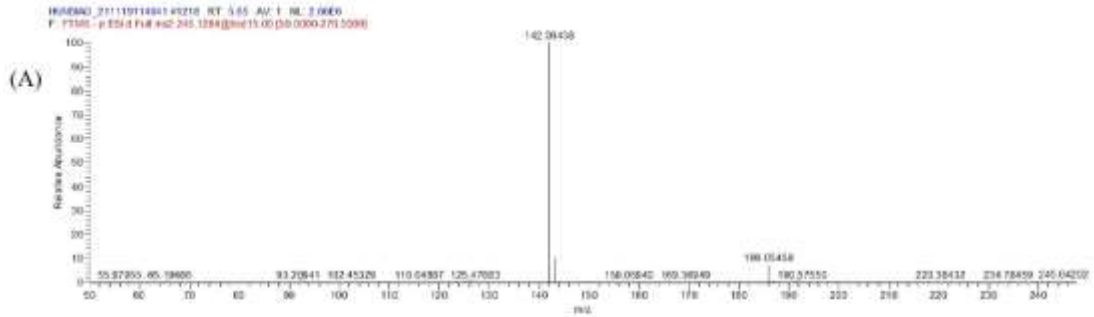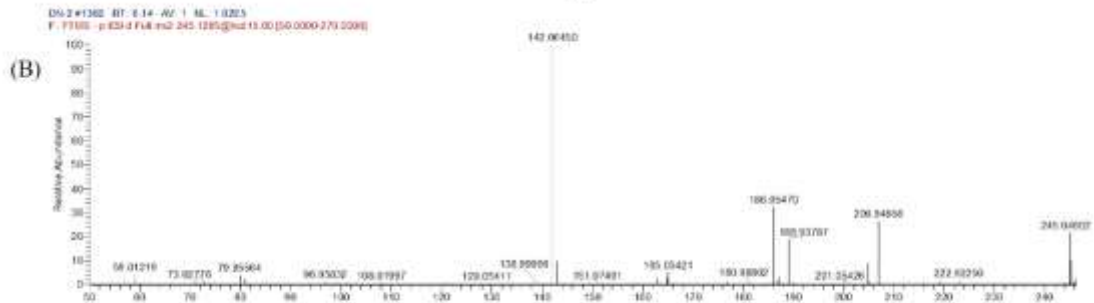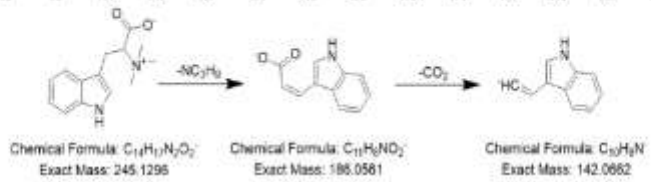

179

180 5. 4-Hydroxybenzaldehyde

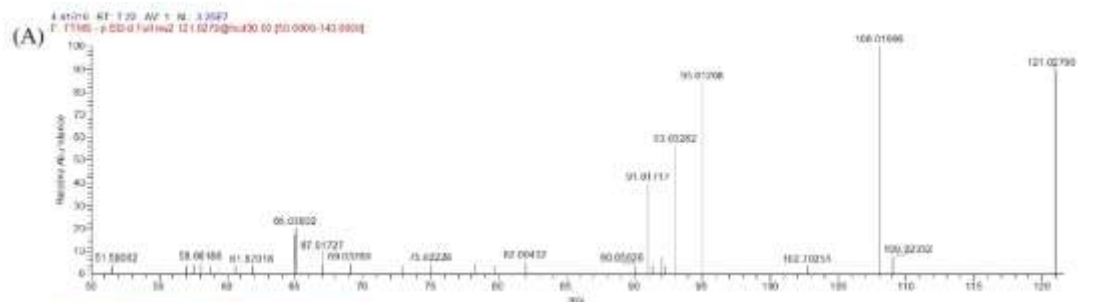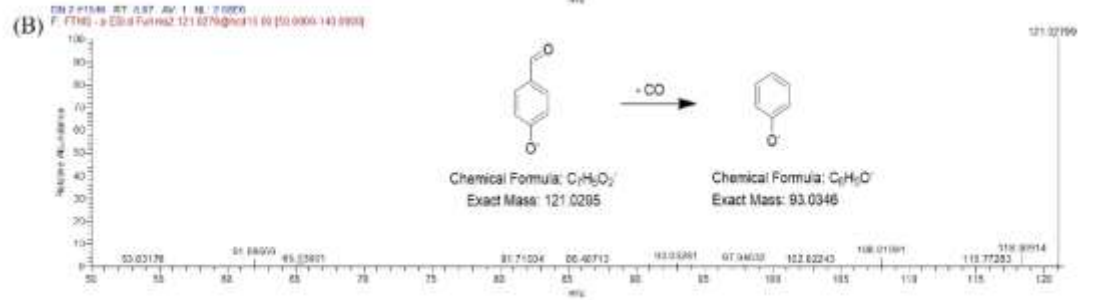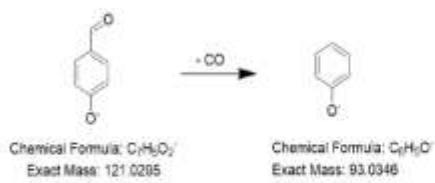

181

182 6. Liquiritigenin

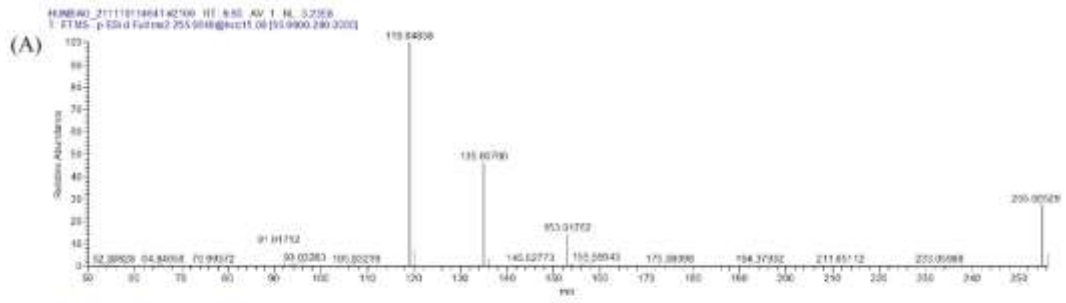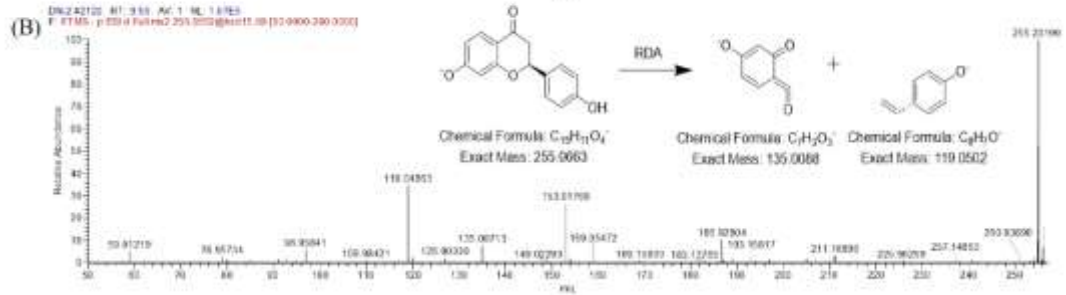

183

184 7. Formononetin

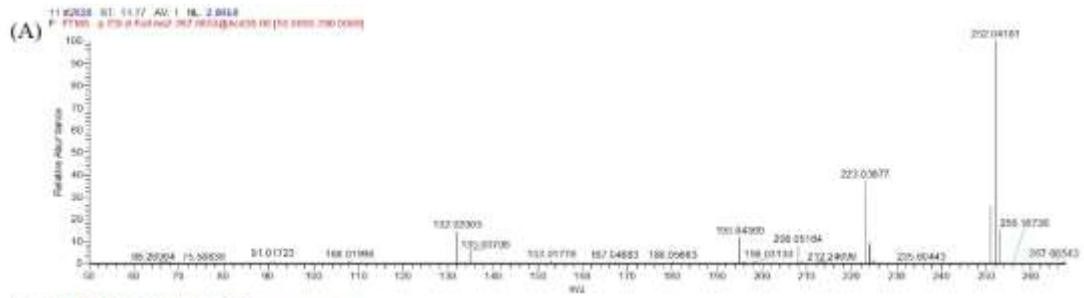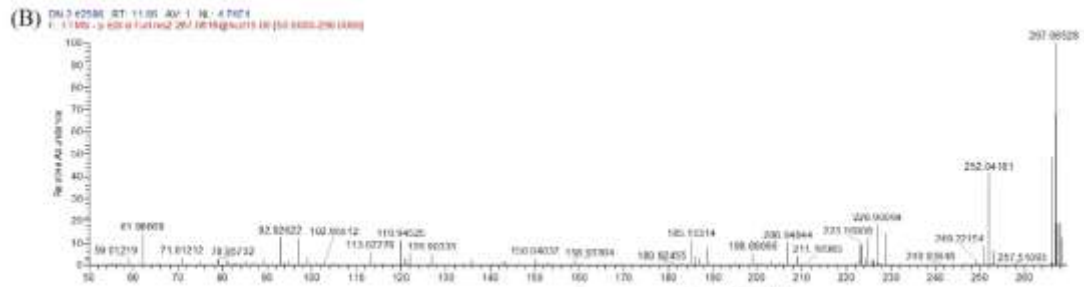

185

186 8. 6-gingerol

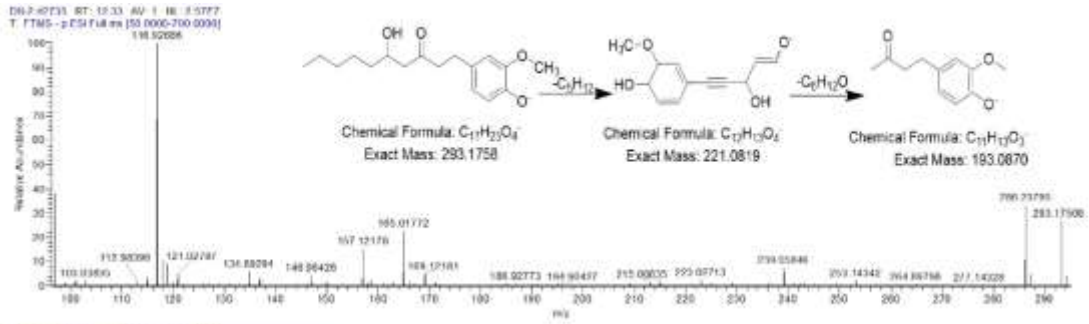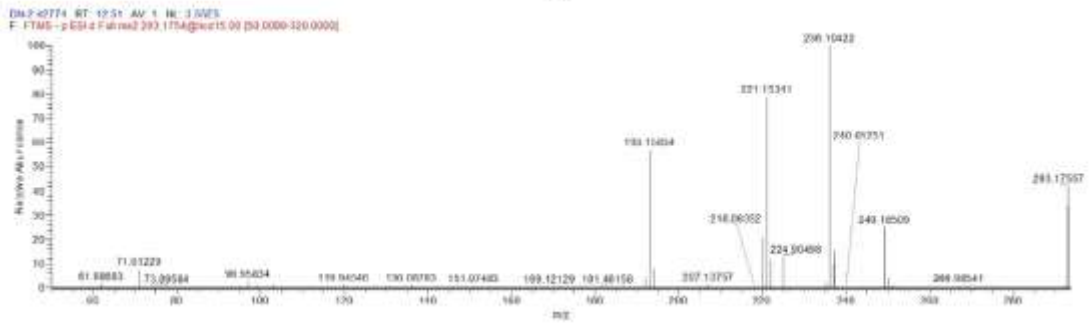

187

188

9. Palmitic acid

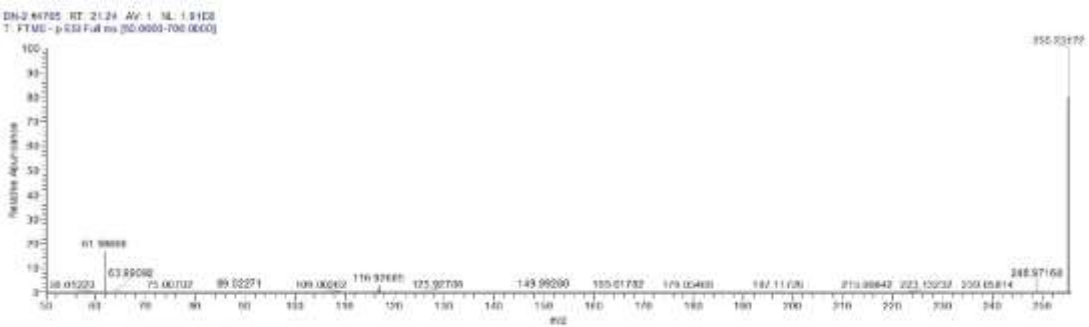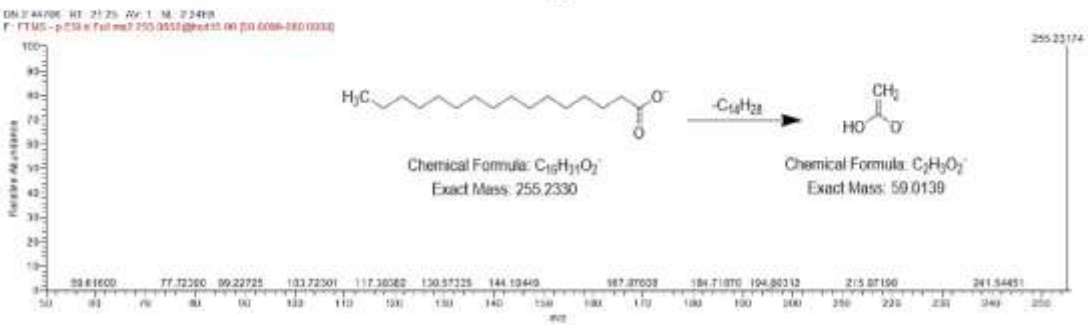

189

190

10. Uric acid

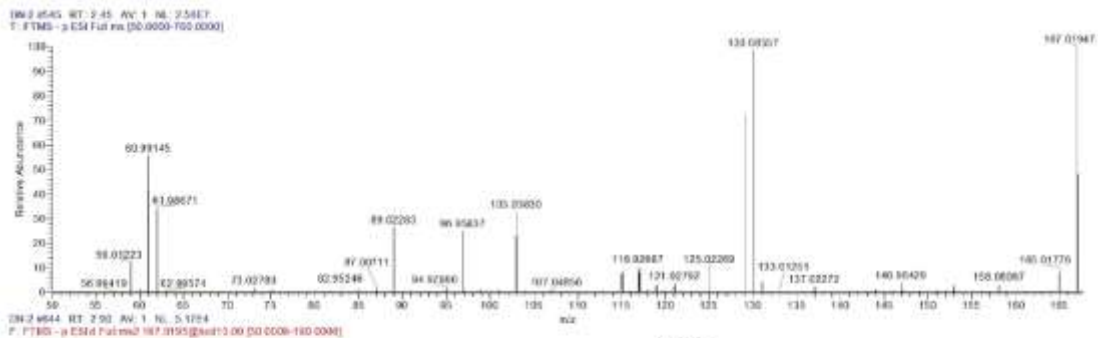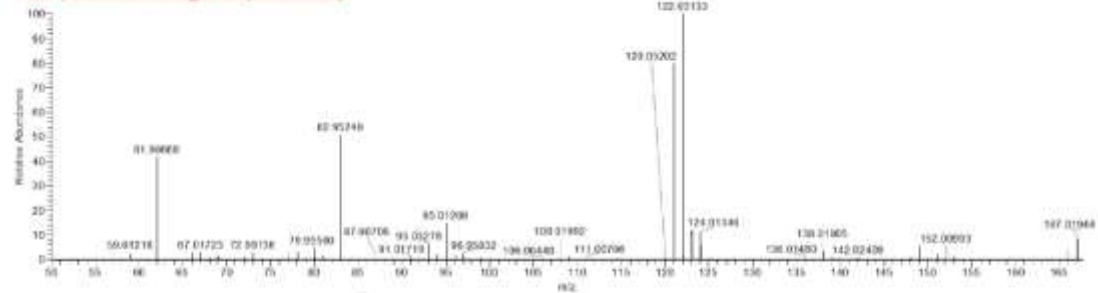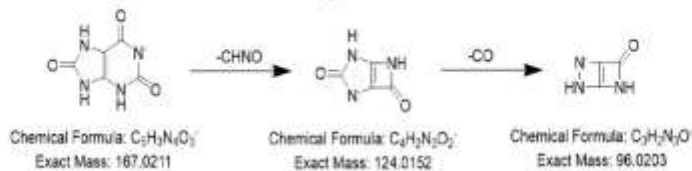

191  
192

11. 3-indoxyl sulfate

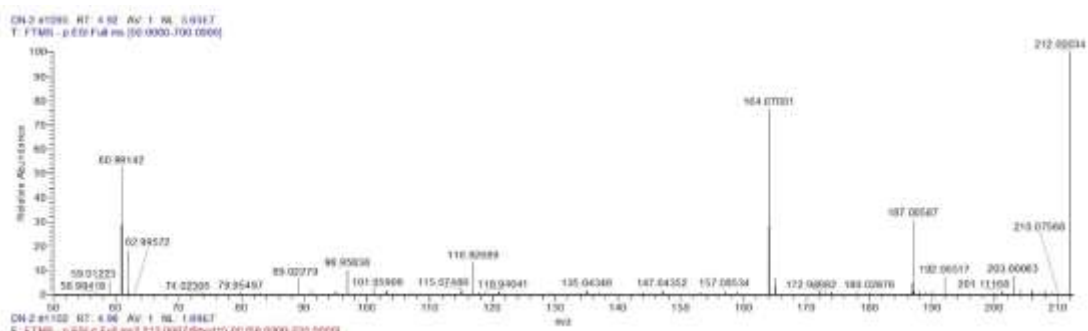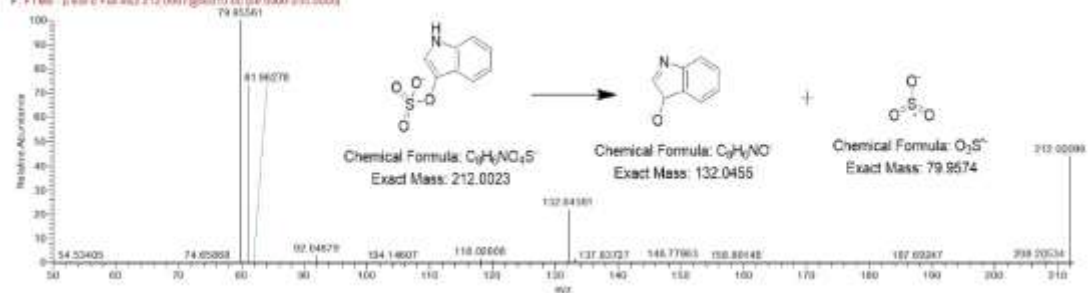

193  
194

12. Indole-3-propionic

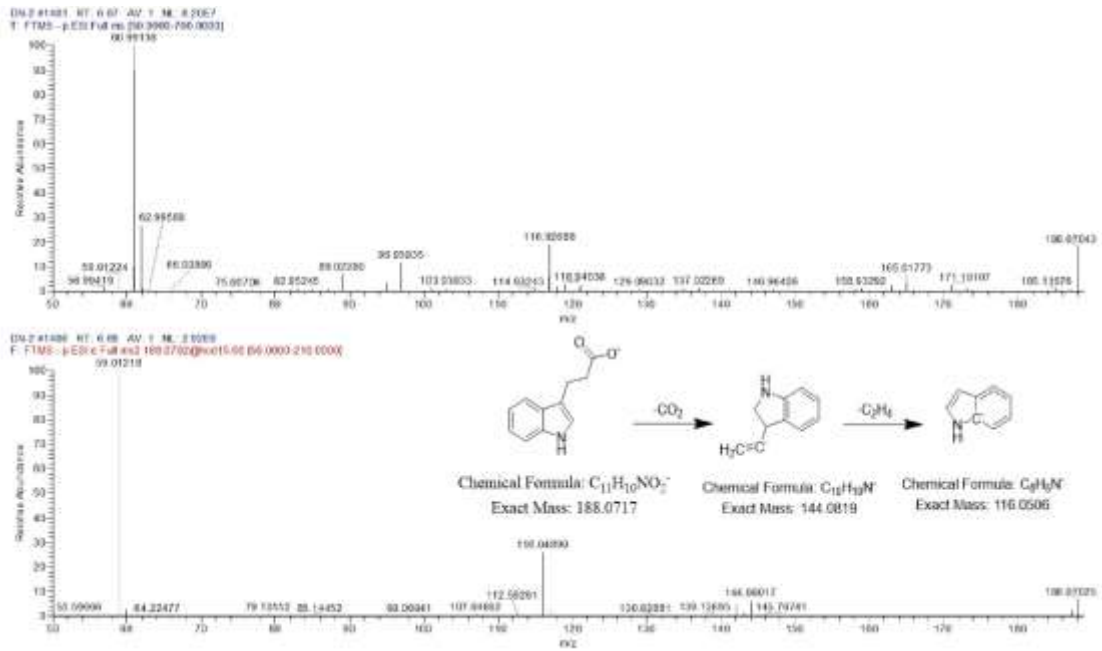

195  
196  
197  
198

Fig S7 Mass spectrometry information and fragmentation patterns of the components absorbed into serum of MSC

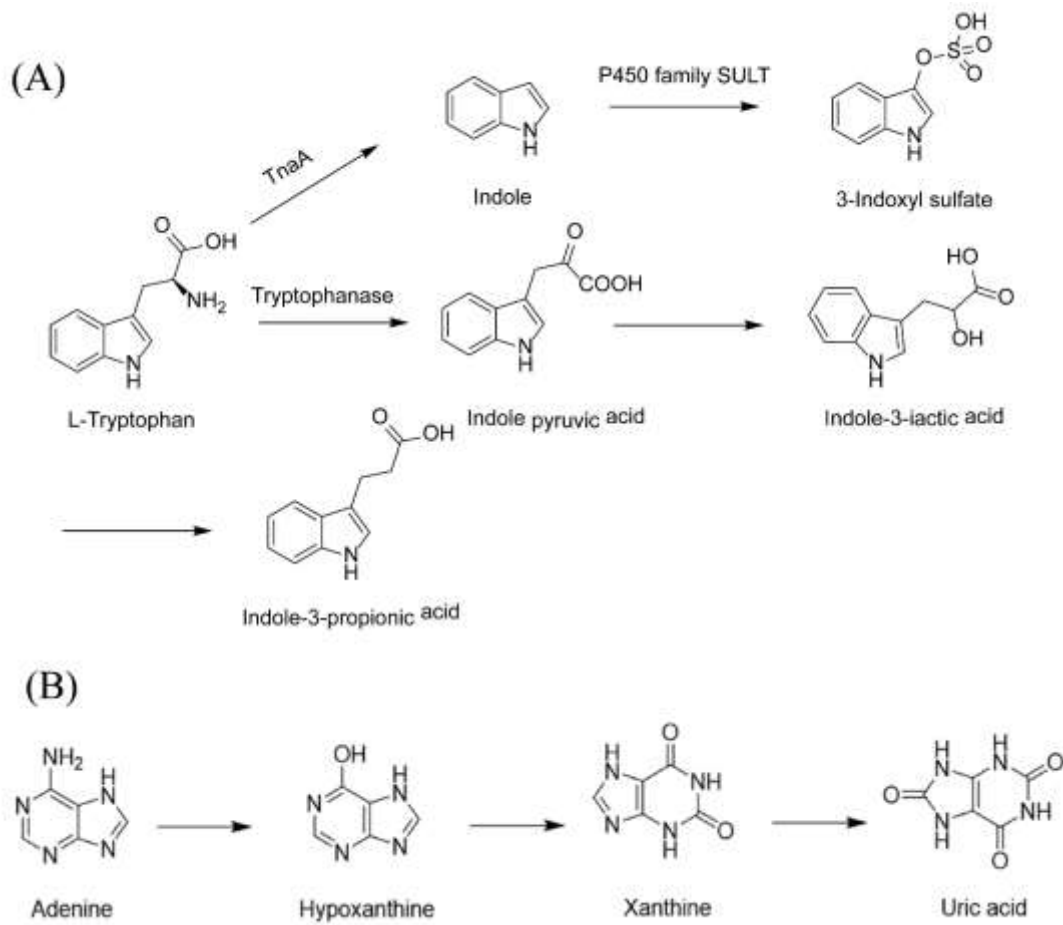

199  
200  
201

Fig S8 The metabolism pathway of (A) Tryptophan and (B) Adenine

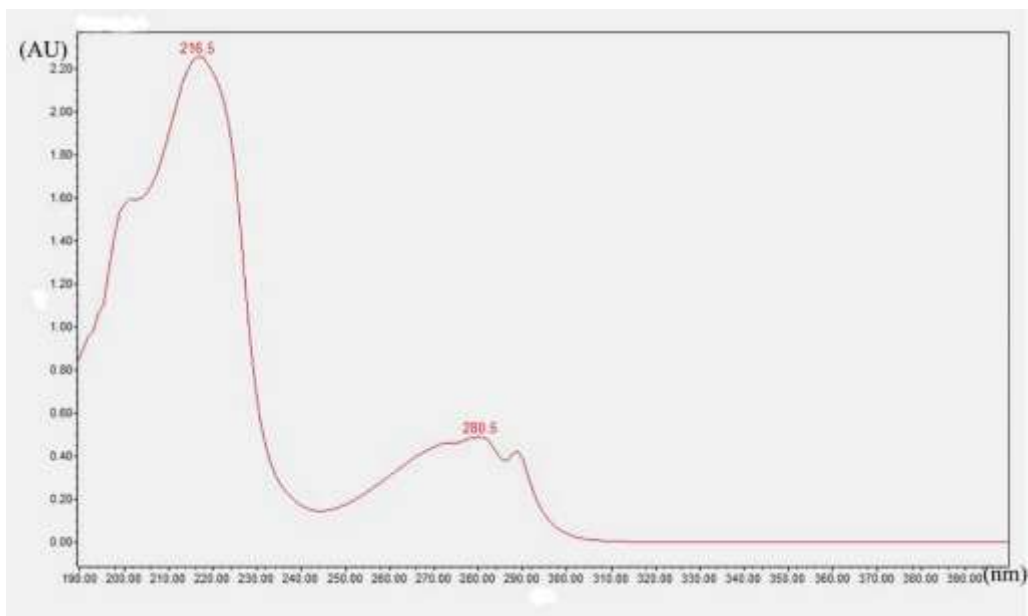

**Fig S9 Full wavelength scanning of lenticin**

202  
203  
204

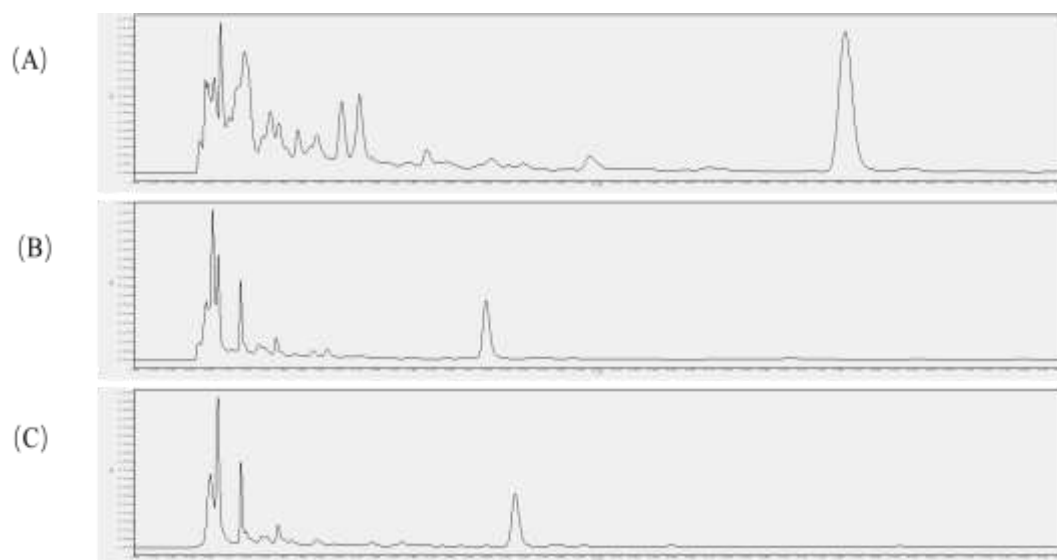

**Fig S10 UPLC diagram of different mobile phase. (A) Methanol water; (B) Acetonitrile water; (C) Acetonitrile-0.1% formic acid**

205  
206  
207



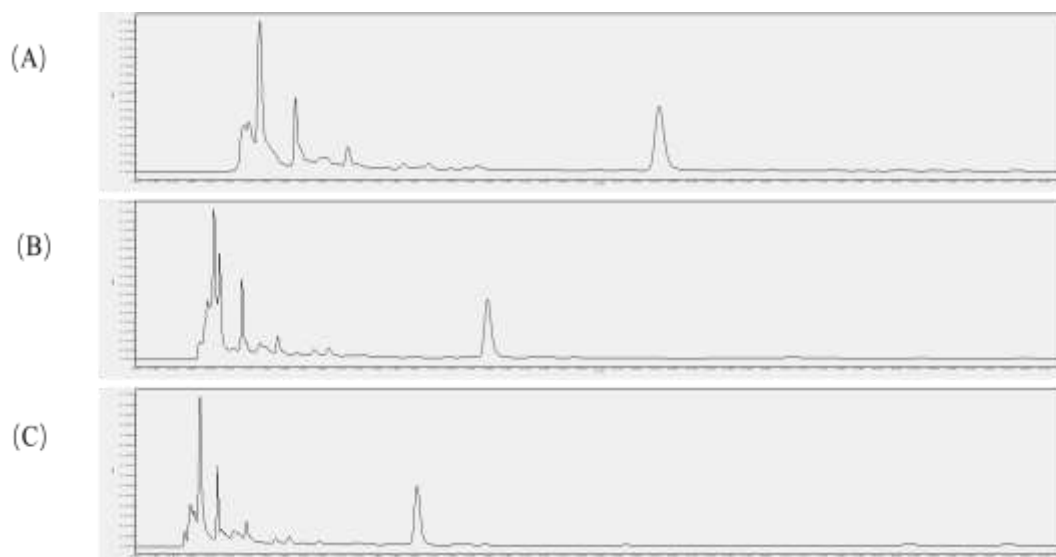

208

209

**Fig S11 UPLC diagram of different flow rates. (A) Flow rate 0.2 ml/min; (B) Flow rate 0.3 ml/min; (C) Flow rate 0.4 ml/min**

210

211

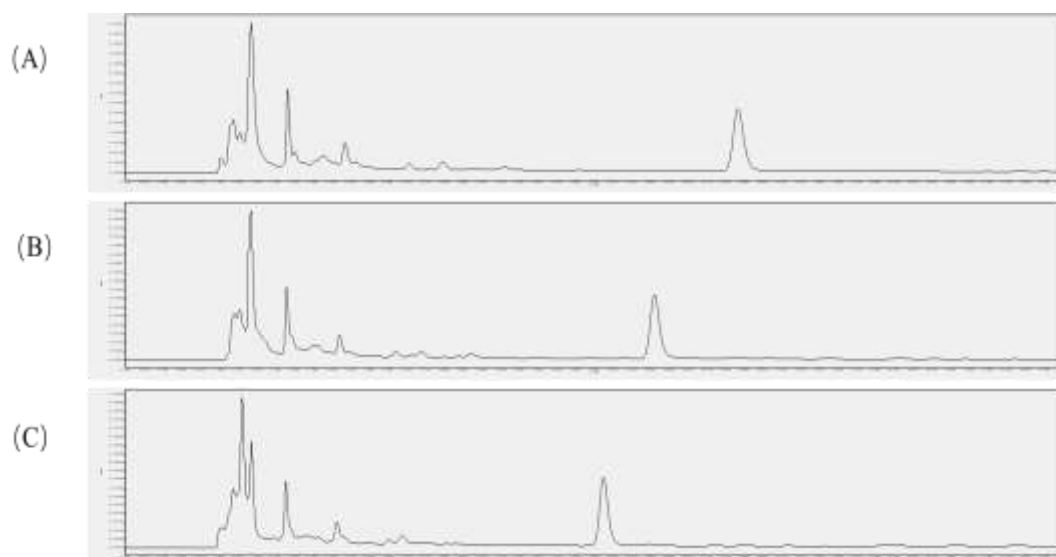

212

213

214

**Fig S12 UPLC diagram of different column temperature. (A) Column temperature 20°C; (B) Column temperature 30°C; (C) Column temperature 40°C**

215

216
